# Supplementary material for: Foot and ankle Osteoarthritis and Cognitive impairment in retired UK Soccer players (FOCUS): protocol for a cross-sectional comparative study with general population controls
Source: PubMed Central journal article supplement (PMC8981329; doi:10.1136/bmjopen-2021-054371), 2022-04-03

# BMJ Open

BMJ Open is committed to open peer review. As part of this commitment we make the peer review history of every article we publish publicly available.

When an article is published we post the peer reviewers' comments and the authors' responses online. We also post the versions of the paper that were used during peer review. These are the versions that the peer review comments apply to.

The versions of the paper that follow are the versions that were submitted during the peer review process. They are not the versions of record or the final published versions. They should not be cited or distributed as the published version of this manuscript.

BMJ Open is an open access journal and the full, final, typeset and author-corrected version of record of the manuscript is available on our site with no access controls, subscription charges or pay-per-view fees (<http://bmjopen.bmj.com>).

If you have any questions on BMJ Open's open peer review process please email [info.bmjopen@bmj.com](mailto:info.bmjopen@bmj.com)

# BMJ Open

## Foot and ankle Osteoarthritis and Cognitive impairment in retired UK Soccer players (FOCUS): protocol for a cross-sectional comparative study with general population controls

|                               |                                                                                                                                                                                                                                                                                                                                                                                                                                                                                                                                                                                                                                                                                                                                                                                                                                                                                                                                                                                                                                                                                                                                                                                                                                                                                                                                                                                                                                                                                                                  |
|-------------------------------|------------------------------------------------------------------------------------------------------------------------------------------------------------------------------------------------------------------------------------------------------------------------------------------------------------------------------------------------------------------------------------------------------------------------------------------------------------------------------------------------------------------------------------------------------------------------------------------------------------------------------------------------------------------------------------------------------------------------------------------------------------------------------------------------------------------------------------------------------------------------------------------------------------------------------------------------------------------------------------------------------------------------------------------------------------------------------------------------------------------------------------------------------------------------------------------------------------------------------------------------------------------------------------------------------------------------------------------------------------------------------------------------------------------------------------------------------------------------------------------------------------------|
| Journal:                      | <i>BMJ Open</i>                                                                                                                                                                                                                                                                                                                                                                                                                                                                                                                                                                                                                                                                                                                                                                                                                                                                                                                                                                                                                                                                                                                                                                                                                                                                                                                                                                                                                                                                                                  |
| Manuscript ID                 | bmjopen-2021-054371                                                                                                                                                                                                                                                                                                                                                                                                                                                                                                                                                                                                                                                                                                                                                                                                                                                                                                                                                                                                                                                                                                                                                                                                                                                                                                                                                                                                                                                                                              |
| Article Type:                 | Protocol                                                                                                                                                                                                                                                                                                                                                                                                                                                                                                                                                                                                                                                                                                                                                                                                                                                                                                                                                                                                                                                                                                                                                                                                                                                                                                                                                                                                                                                                                                         |
| Date Submitted by the Author: | 11-Jun-2021                                                                                                                                                                                                                                                                                                                                                                                                                                                                                                                                                                                                                                                                                                                                                                                                                                                                                                                                                                                                                                                                                                                                                                                                                                                                                                                                                                                                                                                                                                      |
| Complete List of Authors:     | <p>Espahbodi, Shima; University of Nottingham, Academic Rheumatology, School of Medicine; Centre for Sport, Exercise and Osteoarthritis Versus Arthritis, University of Nottingham</p> <p>Fernandes, Gwen; University of Nottingham, Academic Rheumatology, School of Medicine; University of Bristol, Population Health Sciences</p> <p>Hogervorst, Eef ; Loughborough University, NCSEM, School of Sport, Exercise and Health Sciences</p> <p>Thanoon, Ahmed; University of Nottingham, Academic Rheumatology, School of Medicine; Centre for Sport, Exercise and Osteoarthritis Versus Arthritis, University of Nottingham</p> <p>Batt, Mark; Centre for Sports, Exercise and Osteoarthritis Versus Arthritis, University of Nottingham; Nottingham University Hospitals NHS Trust, Sports Medicine</p> <p>Fuller, Colin; Colin Fuller Consultancy Ltd</p> <p>Fuller, Gordon; The University of Sheffield, Centre for Urgent and Emergency Research</p> <p>Ferguson, Eamonn; University of Nottingham, Psychology</p> <p>Bast, Tobias; University of Nottingham, Psychology; University of Nottingham, Neuroscience@Nottingham</p> <p>Doherty, Michael ; University of Nottingham, Academic Rheumatology, School of Medicine; Centre for Sport, Exercise and Osteoarthritis Versus Arthritis, University of Nottingham</p> <p>Zhang, Weiya; University of Nottingham, Academic Rheumatology, School of Medicine; Centre for Sport, Exercise and Osteoarthritis Versus Arthritis, University of Nottingham</p> |
| Keywords:                     | EPIDEMIOLOGY, Dementia < NEUROLOGY, RHEUMATOLOGY                                                                                                                                                                                                                                                                                                                                                                                                                                                                                                                                                                                                                                                                                                                                                                                                                                                                                                                                                                                                                                                                                                                                                                                                                                                                                                                                                                                                                                                                 |

SCHOLARONE™  
Manuscripts

1 **Foot and ankle Osteoarthritis and Cognitive impairment in retired UK Soccer players**  
2 **(FOCUS): protocol for a cross-sectional comparative study with general population**  
3 **controls**  
4  
5  
6

7 Shima Espahbodi,<sup>1,2,3</sup> Gwen S Fernandes,<sup>1,4</sup> Eef Hogervorst,<sup>5</sup> Ahmed Thanoon,<sup>1,2,3</sup> Mark Batt,<sup>2,10</sup> Colin  
8 W Fuller,<sup>6</sup> Gordon Fuller,<sup>7</sup> Eamonn Ferguson,<sup>3,8</sup> Tobias Bast,<sup>3,8,9</sup> Michael Doherty,<sup>1,2,3</sup> Weiya  
9 Zhang<sup>1,2,3,8,11</sup>  
10  
11  
12  
13  
14

15 <sup>1</sup> Academic Rheumatology, School of Medicine, University of Nottingham, UK

16 <sup>2</sup> Centre for Sport, Exercise and Osteoarthritis Research Versus Arthritis, University of Nottingham

17 <sup>3</sup> Pain Centre Versus Arthritis, University of Nottingham

18 <sup>4</sup> Population Health Sciences, Bristol Medical School, University of Bristol, UK

19 <sup>5</sup> NCSEM, School of Sport, Exercise and Health Sciences, Loughborough University

20 <sup>6</sup> Colin Fuller Consultancy Ltd, Sutton Bonington, UK

21 <sup>7</sup> Gordon Fuller, Centre for Urgent and Emergency Research, University of Sheffield

22 <sup>8</sup> School of Psychology, University of Nottingham

23 <sup>9</sup> Neuroscience@Nottingham, University of Nottingham

24 <sup>10</sup> Nottingham University Hospitals NHS Trust

25 <sup>11</sup> National Institution for Health Research (NIHR), Nottingham Biological Research Centre

26  
27  
28  
29  
30  
31  
32  
33  
34  
35  
36  
37  
38  
39  
40  
41  
42 Address for correspondence

43 shima.espahbodi1@nottingham.ac.uk

44  
45  
46 Word count: 4109  
47  
48  
49  
50  
51  
52  
53  
54  
55  
56  
57  
58  
59  
60

## ABSTRACT

### Introduction

Professional footballers commonly experience sports-related injury and repetitive microtrauma to the foot and ankle, placing them at risk of subsequent chronic pain and osteoarthritis (OA) of the foot and ankle. Similarly, repeated heading of the ball, head/neck injuries and concussion have been implicated in later development of neurodegenerative diseases such as dementia. A recent retrospective study found that death from neurodegenerative diseases was higher amongst former professional soccer players compared with age matched controls. However, well-designed lifetime studies are still needed to provide evidence regarding the prevalence of these conditions and their associated risk factors in retired professional football players compared to the general male population.

### Objectives

To determine whether former professional male footballers have a higher prevalence than the general male population of: (1) foot/ankle pain and radiographic OA; and (2) cognitive and motor impairments associated with dementia and Parkinson's disease. Secondary objectives are to identify specific football-related risk factors such as head impact/concussion for neurodegenerative conditions and foot/ankle injuries for chronic foot/ankle pain and OA.

### Methods and analysis

This is a cross-sectional, comparative study involving a questionnaire survey with sub-samples of responders being assessed for neurocognitive function by telephone assessment, and foot/ankle OA by radiographic examination. A sample of 900 adult, male, ex professional footballers will be recruited and compared with a control group of 1100 age-matched general population men between 40-100 years old. Prevalence will be estimated per group. Poisson regression will be performed to determine prevalence ratio between the populations and Logistic regression will be used to examine risk factors associated with each condition in footballers.

### Ethics and dissemination

This study was approved by the East Midlands-Leicester Central Research Ethics Committee on 23 January 2020 (REC ref: 19/EM/0354). The study results will be disseminated at national and international meetings and submitted for peer-review publication.

### Strengths and limitations of this study

- Largest study of head injuries/heading, concussion, ball type, and cognitive impairment in retired professional footballers versus controls in the UK.
- Largest study of foot/ankle injuries and OA/pain in retired professional footballers versus controls in the UK, with standardised foot/ankle radiographs obtained in a sample of each
- Case-control study design with control men recruited from a community-based population sample representative of men in the UK general population.

1  
2  
3  
4  
5  
6  
7  
8  
9  
10  
11  
12  
13  
14  
15  
16  
17  
18  
19  
20  
21  
22  
23  
24  
25  
26  
27  
28  
29  
30  
31  
32  
33  
34  
35  
36  
37  
38  
39  
40  
41  
42  
43  
44  
45  
46  
47  
48  
49  
50  
51  
52  
53  
54  
55  
56  
57  
58  
59  
60

- Self-reporting of injuries and concussive symptomatology during careers/lifetime may be subject to recall bias, and non-involvement by individuals with severe cognitive impairment may cause left censorship.

For peer review only

## INTRODUCTION

Professional footballers are at high-risk of sports-related injuries, including those to the head, thigh, knee and foot/ankle.<sup>1</sup> Over the past 25 years, injuries to the thigh (23-26%), foot/ankle (20-23%) and knee (14-18%) have consistently been reported to be the three most common injury sites in professional football.<sup>2-6</sup> A study of one English Premier League club found that over a 4-season period, 20% of all injuries involved the foot/ankle with a mean return to play time of 54 days.<sup>7</sup> Injuries to the ankle lateral ligament complex, particularly the anterior talofibular ligament, were most frequent, accounting for 31% of all foot/ankle injuries. More minor repetitive impact-loading to the ankle/foot may also lead to joint and periarticular injury. However, despite the high incidence of acute injuries there is a paucity of robust evidence regarding subsequent osteoarthritis (OA) development and chronic pain in the foot/ankle joints of professional footballers. Some studies report a prevalence of ankle OA ranging from 12% - 17%.<sup>1,8</sup> However, these studies had small sample sizes without adequate control groups and were based on self-reported diagnosed ankle OA. Importantly, there are no published data on the prevalence of foot pain and foot OA in retired professional footballers. Consequently, foot and ankle OA is not formally recognised as an occupational disease for professional footballers, and there is a lack of evidence regarding the football-related risk factors associated with this condition.

Retired professional footballers with OA have a significantly lower health-related quality of life (QoL) compared to players without OA.<sup>9</sup> Ninety per cent of former professional footballers suffering with OA have moderate to severe joint pain, and 37% of these retired players reported moderate to severe depression and anxiety due to their medical condition.<sup>1,10</sup> In ex- UK footballers with OA, a higher frequency of disability and work-related disability has been reported compared to those without OA.<sup>11</sup> More recently we reported that depressive and anxiety symptoms in ex-footballers are comparable to that in the general population. However, ex-footballers reported significantly more sleep problems, negative mood profiles, more widespread bodily pain, and higher analgesic usage compared to controls.<sup>12</sup> Whilst OA might not be a life-threatening disease, its long-term effects on both the physical and mental health of a retired footballing population need further attention.

Professional footballers may also be at increased risk of developing neurodegenerative diseases such as dementias and Parkinson's disease, potentially arising from major neck/head injury, overt mild traumatic brain injury (mTBI) causing concussion, or repetitive microtrauma from heading the ball.<sup>13-16</sup> TBI has been identified as a risk factor for the development of dementia in the general population, specifically Alzheimer's, in a longitudinal cohort study (n=2.8 million) spanning 36 years.<sup>17</sup> In that study, moderate to severe TBI increased dementia risk across all ages, whereas mTBI (concussion) increased risk in those aged over 65 years.<sup>17</sup> Repetitive heading of the ball during matches and training sessions, head-to-head or head to elbow/knee/foot collisions between players, or accidental heading might additionally result in concussion, neuropsychiatric and cognitive deficits.<sup>18</sup> The recent FIELD study retrospectively compared mortality from neurodegenerative disease in 7676 former professional soccer

1 players with that amongst 23000 matched general population controls in Scotland. Former footballers  
2 had a 3.5 times higher death rate from neurodegenerative diseases compared to matched controls.  
3 Risk of death varied according to disease subtype and was 5 times higher in those with Alzheimer's and  
4 2 times higher in those with Parkinson's respectively.<sup>19</sup> Whilst of considerable importance, these  
5 findings need to be confirmed in the life-time of professional footballers and matched controls. Still, little  
6 is known about the increased prevalence of neurodegenerative diseases and related risk factors among  
7 retired professional players. Recent literature continues to be conflicting and no study has provided  
8 conclusive evidence for the relationship between heading/head impacts and neurodegenerative  
9 diseases. Two recent systematic reviews support these conclusions and emphasise the need for high  
10 quality, large-scale prospective studies.<sup>20 21</sup>

11 Previously, we demonstrated a 2-3 times higher prevalence of knee OA in 1207 male ex-footballers  
12 compared to 4085 men in the general population<sup>22</sup> and identified knee injury and training load as the  
13 main football-specific factors for this.<sup>23</sup> We will use the same population samples for the Foot/ankle  
14 Osteoarthritis and Cognitive impairment in UK Soccer players (FOCUS) study. The primary  
15 objectives of this study are to determine whether, compared to age-matched men in the general  
16 population, ex-professional UK footballers have a higher prevalence of:

- 17  
18  
19  
20  
21  
22  
23  
24  
25  
26  
27  
28  
29 (1) foot/ankle pain and radiographic OA; and  
30  
31 (2) cognitive impairment, and neurodegenerative diseases particularly dementia and Parkinson's  
32 disease.  
33

34  
35 Secondary objectives are to identify factors associated with the risks of these conditions in footballers.  
36  
37  
38

39 We have intentionally included investigations into foot/ankle OA together with neurodegenerative  
40 disease in this single cross-sectional study as it will allow both important research questions to be  
41 addressed concurrently. Furthermore, we anticipate that embedding questions and assessments on  
42 mental/cognitive function into a general health survey may increase the response rate and minimise  
43 the selection bias compared to asking questions in a survey focused solely on a single disease.  
44  
45  
46  
47  
48

## 49 **METHODS AND ANALYSIS**

### 50 **Study design**

51 This will be a cross-sectional study comparing UK male ex-professional footballers and age-matched  
52 men in the general population. It will involve three discrete stages: (1) a postal questionnaire survey to  
53 all study participants; (2) a telephone assessment of cognitive function in a sub-sample of each group;  
54 and (3) a radiographic assessment of both feet and ankles in a sub-sample of each group. Figure 1  
55 shows the study stages and procedures.  
56  
57  
58  
59  
60

### **Participants and recruitment**

1 The FOCUS footballer questionnaire, together with a Participant Information Sheet, Consent Form,  
2 stamped return envelope, and letter of endorsement from the Professional Footballers' Association  
3 (PFA) and Football Association (FA), will be posted across the UK to 900 ex-professional male  
4 footballers who previously participated in the Nottingham knee OA footballer study<sup>22 24</sup> and who indicated  
5 willingness to be contacted again for future studies. All are retired male footballers aged 40-100 years  
6 old, registered with the PFA or club player Association (League Club level). A slightly adapted  
7 questionnaire (e.g., no questions are included related to professional football), Participant Information  
8 Sheet, Consent Form, and stamped return envelope will be sent to 1100 age-matched men aged 40-  
9 100 in the East Midlands general population, who are on the Knee Pain in the Community (KPIC)  
10 database<sup>25</sup> and have indicated willingness to be contacted about new studies. This is the same source  
11 for general population controls as in our previous study on knee OA in footballers.<sup>22</sup> The Participant  
12 Information sheets state the entirely voluntary nature of the study with no inducements for participation.  
13 After four weeks a Reminder letter with questionnaire pack will be posted to those participants from  
14 whom there has been no response to the initial questionnaire pack.

25 Questionnaire responders who indicate willingness to be contacted further for telephone assessment  
26 and/or radiographs will be selected for stages 2 and 3, respectively. At least two hundred and fifty  
27 telephone assessments will be conducted first (randomly if possible), and the radiographs will be  
28 obtained later when COVID-19 restrictions permit us to utilize NHS Trust Radiology facilities. Exclusion  
29 criteria for the assessments include an inability to provide written informed consent (both assessments)  
30 and severe injury, amputation or neuropathic (Charcot) arthropathy of both feet (radiographic  
31 assessment only), and at the participant's request.

39 At least two hundred and fifty footballers will be invited to attend the radiology department of their nearest  
40 NHS collaborating hospital where foot/ankle radiographs will be undertaken. The selection will be based  
41 on first come first served, as well as the convenience to travel to the nearest hospitals. Currently we  
42 have five collaborating NHS hospitals including Nottingham, Salford, Leeds, Southampton, and Imperial  
43 College London. Similarly, at least 250 control men from a community-based population sample located  
44 within Nottingham and adjacent areas (Derbyshire, Lincolnshire, Leicestershire) representative of men  
45 in the general UK population, will have radiographs at Nottingham City Hospital campus. Return of  
46 completed questionnaires will be taken as consent to the questionnaire survey. For those participants  
47 agreeing to a telephone assessment consent will be taken verbally over the phone, after the participants  
48 have read and agreed to the consent form and patient information sheet posted to them. All participants  
49 attending for radiographs will be met by our research team who will obtain written informed consent  
50 prior to the taking of radiographs.

## 60 Questionnaire



Our FOCUS footballer questionnaire was designed to capture detailed information about foot/ankle pain, GP-diagnosed OA, significant injuries, surgery, and injections to the feet/ankles. Latter sections of the questionnaire capture detailed information about GP-diagnosed dementia, Alzheimer's and Parkinson's disease, the frequency of heading the ball during professional play, the type of ball, concussion history/symptoms, head injuries, and memory/cognition problems. For the general population male controls, the questionnaire includes all the same questions except for the absence of specific football-related questions. The layout/format of the questionnaire is consistent between footballers and control men.<sup>25</sup> Table 1 summarises the FOCUS questionnaire domains.

**Table 1** FOCUS Questionnaire domains and measurements

| Section Domains                           | Questions and Instruments                                                                                                                                                                                                                                                                                                                                                                                                                                                                                                                                                                                                                                                                      |
|-------------------------------------------|------------------------------------------------------------------------------------------------------------------------------------------------------------------------------------------------------------------------------------------------------------------------------------------------------------------------------------------------------------------------------------------------------------------------------------------------------------------------------------------------------------------------------------------------------------------------------------------------------------------------------------------------------------------------------------------------|
| 1. Demographic and current health         | Date of birth, height, weight, list of comorbidities including diabetes, stroke, dementia, Alzheimer's, Parkinson's, depression, anxiety, HBP. Smoking and alcohol consumption. All current medication both prescribed and alternative/over the counter.                                                                                                                                                                                                                                                                                                                                                                                                                                       |
| 2. Bodily pain                            | Body pain mannequin for previous month's pain (current). fibromyalgia mannequin (WPI) and SSSs past week's pain.                                                                                                                                                                                                                                                                                                                                                                                                                                                                                                                                                                               |
| 3. Foot and ankle pain                    | Pain present in the feet and/or ankles in the past month (current) and/or past 3 months (chronic), age at pain onset, diagnosis of foot OA, region specific <i>significant</i> foot pain (ankle, mid-foot, big toe, other toes) and age range at onset of pain. Pain Detect Questionnaire and Pain Catastrophizing Scale.                                                                                                                                                                                                                                                                                                                                                                      |
| 4. Injuries and operations to feet/ankles | Significant football-related injury to ankles/feet/toes. Region specific (ankle, mid-foot, big toe, other toes) total number of significant football injuries throughout career, Type of Injury (e.g. ligament rupture) and age. Significant NON-football related injury ever (same questions as above).<br><br>Injections into ankles, type of injection (cortisone, anaesthetic, don't know, or other), greatest number of injections into each ankle in a season, and throughout career. Injections elsewhere in foot, where and how many. Surgical interventions to ankle or toes, type of procedure (e.g. fracture fixation), and age. If flat-footed as informed by health professional. |
| 5. Hallux valgus                          | Current and constitutional toe alignment using line drawings (straight or bunion/degree of angulation).                                                                                                                                                                                                                                                                                                                                                                                                                                                                                                                                                                                        |
| 6. How you feel                           | Hospital Anxiety and Depression Scale (HADS).                                                                                                                                                                                                                                                                                                                                                                                                                                                                                                                                                                                                                                                  |
| 7. Quality of life                        | Short Form-36 (SF-36) Health Survey.                                                                                                                                                                                                                                                                                                                                                                                                                                                                                                                                                                                                                                                           |
| 8. Heading during professional football   | Heading frequency during a professional match and training session. General <i>heading play</i> (minor, moderate, major) during a match. Specific 'Only Heading' training sessions                                                                                                                                                                                                                                                                                                                                                                                                                                                                                                             |

ever, frequency pre-season and during season. Type of football played with during career.

## 9. Concussion and head injuries

Concussion Definition. Concussion diagnosis from professional football play, number of episodes, symptoms. Concussion diagnosis from other/accident/fall, number, symptoms. Serious head injury, number, diagnosis. Frequency of Head impact NOT from heading not concussive. Concussion symptoms ever from professional play (unreported), frequency, symptoms. Concussion symptoms ever (unreported) outside of professional football e.g., fall, accident, number, symptoms.

## 10. Memory and thinking

Current Memory problems, worsening, causing difficulty with daily function, work or socially. The Test Your memory (TYM) Questionnaire.

HBP - High Blood Pressure; WPI - Widespread Pain Index; SSS - Symptom Severity Scale; OA - osteoarthritis Pain Detect Questionnaire, Pain Catastrophizing Scale, Hospital Anxiety and Depression Scale, SF-36 Health Survey and Test Your Memory Questionnaire are referenced in the main text.

The questionnaire requests information about the individual, their medical history, smoking and alcohol usage, and all current medications whether prescribed or over the counter. A body pain mannequin is used to record pain experienced for most days of the past month anywhere in the body, and the widespread pain index (WPI) and system severity scale (SSS)<sup>26</sup> are included to identify symptoms and likely diagnosis of fibromyalgia. Line drawings illustrating different regions of the foot (i.e. toes, mid-foot, and heel) allow participants to specify the site of any significant pain for most days in the past month and/or over a three month period. The Pain Detect Questionnaire (PDQ), modified to focus on ankle/foot pain only, will be used to screen for neuropathic type pain,<sup>27</sup> and the participants' thoughts and feelings during their foot pain experience will be measured with the Pain Catastrophizing Scale.<sup>28</sup>

The footballers are asked to report any football-related significant injury ever sustained to their feet, ankles, or toes as one which *caused pain for most days for at least a 3-month period* and the type of injury. A similar free text and tick-box table is included which asks for any significant non-football related injuries to the feet/ankles/toes. Information regarding injections into the ankles over the course of the players career are requested via a tick box table (type of injectable, location, side) and total number ever received in any season. A similar table with a free text and tick-box asks the footballers to report any surgery to their ankle and/or toes. Control participants are asked the same set of questions about significant injury, injections, and surgery to the ankles and/or toes but without mention of football. Current toe alignment and constitutional toe alignment (in their 20's) will be assessed in all participants using validated line drawings.<sup>29</sup>

Anxiety and depression symptoms will be assessed using the well validated Hospital and Anxiety Depression Scale (HADS).<sup>30 31</sup> Quality of Life (QoL) will be measured with the well-validated RAND 36-item Health Survey 1.0 (SF-36) adapted for the physical and mental health components respectively.<sup>32</sup>

1 Information related to heading the ball during footballers' professional careers will be captured with  
2 detailed questions developed with our retired footballer group (see Patient and Public Involvement).  
3 This will be followed with questions related to concussion diagnoses, symptomatology, and head  
4 injuries/impacts both during professional play and outside of professional football.<sup>34</sup> Control participants  
5 will be asked the same questions relating to head injury and concussions but without mention of football.  
6  
7  
8  
9

10  
11 Final sections will capture information on memory/cognition and include the Test Your Memory (TYM)  
12 assessment,<sup>35</sup> which can be self-administered for use in postal surveys (personal communication JM  
13 Brown 2019). TYM is a short cognitive test for detecting Alzheimer's disease (AD) and other cognitive  
14 problems and is reported to be more sensitive for detecting mild AD than the Mini Mental State  
15 Examination (MMSE).<sup>35</sup>  
16  
17  
18  
19

### 20 21 22 **Telephone cognitive assessments**

23 Telephone assessments will follow a standardised script starting with the researchers introducing  
24 themselves and the study, checking that the participant is in a room without distractions, whether they  
25 use a hearing aid, confirming consent, their name and date of birth. An initial call will be made to book  
26 in the telephone assessment at a time convenient to each participant. The validated tools described  
27 below will be administered as per published procedures.  
28  
29  
30  
31

32 Originally developed as a dementia screen, the Telephone Interview for Cognitive Status-modified  
33 (TICS-m) is a test for cognitive function which can be administered over the telephone.<sup>36 37</sup> It includes  
34 four domains on (1) orientation; (2) registration (free recall), recent memory and delayed recall  
35 (memory); (3) attention/calculation; (4) comprehension, semantic memory and repetition (language).  
36 The 13-items (maximum score 39) include: (1) day, date, season, age, telephone number; (2) a 10-word  
37 list learning exercise then free recall of that word list; (3) subtractions and counting backwards; (4)  
38 responsive naming, current reigning monarch and prime minister; (5) word opposites; (6) repetition; and  
39 (7) delayed recall of 10-word list. TICS-m is well validated for detecting a range of mild to moderate  
40 cognitive disorders with comparable sensitivity and specificity as a screening tool for dementia and  
41 Alzheimer's.<sup>38-40</sup>  
42  
43  
44  
45  
46  
47

48 The Verbal Fluency Test (VFT) is a short task of verbal functioning and typically consists of a task called  
49 category (or semantic) fluency where participants are given one minute to name as many unique words  
50 as possible within a semantic category (animals in this study). The category 'animals' is often used,  
51 however alternatives are 'fruits and vegetables', 'cities and towns' and 'items of clothing'. The  
52 participant's score is the number of unique correct words produced in 60 seconds.<sup>41</sup> Word generation  
53 deficits in those with dementia, including Alzheimer's, have been well documented.<sup>42</sup>  
54  
55  
56  
57  
58

59 The Hopkins Verbal Learning Test (HVLT)<sup>43</sup> is a quick and easy to administer tool which will be used to  
60 screen for dementia. It is a word-learning test measuring episodic verbal memory, consists of three  
trials of free-recall of a 12-item (word) list followed by yes/no recognition from the participant. After the

1 third learning trial, the participant is read 24 words and asked to say “yes” for each word that appeared  
2 on the recall list (12 targets) and “no” for each word that did not (12 distractors). The total immediate  
3 recall (reflecting learning ability, is obtained by repeating the same word list 3 times and adding up all  
4 correctly recalled words over the 3 trials) is calculated. Good validity and reliability have been  
5 demonstrated for the HVLТ, and it is cross culturally applicable and well tolerated by elderly people.<sup>44</sup>  
6  
7

8  
9 Along with cognitive measures, we have included the assessment of functional activities as impairment  
10 in these is a critical feature in the diagnosis of dementia.<sup>45</sup> Lawton’s Instrumental Activities Daily Living  
11 (IADL) scale is one of the most commonly used tools consisting of 8 items including 2 community items  
12 (mode of transport and shopping), 3 personal management (ability to use the telephone, handle money  
13 matters, and prepare one’s own medication) and 3 household items (doing housekeeping, laundry, and  
14 preparing food). Responses to each of the eight items in the scale are coded as 0 (unable), 1 (partially  
15 able), or 2 (able) and are the responses summed. Summary scores range from 0 (low function,  
16 dependent) to 8 (high function, independent).<sup>46</sup>  
17  
18  
19  
20  
21  
22  
23

## 24 **Radiographic assessment**

25  
26 Informed written consent will be obtained prior to radiographs which will be performed by each  
27 respective NHS Trust’s radiology staff. Radiographs will be taken bilaterally and weight-bearing for the  
28 foot and ankle separately. Foot dorsoplantar, medial oblique, and lateral views, and ankle  
29 anteroposterior views will be taken, as detailed in the Standard Operating Procedure (SOP).  
30 Examination and scoring of region-specific OA will be done of the hindfoot (ankle, subtalar), midfoot,  
31 and 1<sup>st</sup> metatarsophalangeal joint (MTPJ) using the La Trobe Foot Atlas and scorings.<sup>47, 48</sup> Those with  
32 a Kellgren and Lawrence score of less than 2 for any foot/ankle compartment and equivalent categories  
33 (i.e., completely normal, possible osteophyte or doubtful narrowing) will be defined as non-OA. Those  
34 who satisfy the definition of a KL score of greater than 2 ( $\geq 2$ ) or equivalent for any compartment of either  
35 foot or ankle will be defined as OA.<sup>49</sup> Also, those with foot/ankle OA and concurrent foot/ankle pain will  
36 be defined as symptomatic foot/ankle OA.  
37  
38  
39  
40  
41  
42  
43  
44  
45  
46

## 47 **Patient and public involvement**

48 Questionnaire sections specific to professional football play were developed in partnership with ex-  
49 professional footballer groups, whilst those specific to sports-related concussion and  
50 memory/neurocognitive decline were developed in collaboration with concussion and dementia experts,  
51 (JM Brown).  
52  
53

54  
55 Our retired player group contributed to the content, design and layout of the FOCUS Questionnaire.  
56 Through in-person meetings (SE), two retired professional players from Notts County Football Club  
57 directly advised (having had feedback from other retired players) specifically on the questions pertaining  
58 to:  
59  
60

- Heading frequency and bandings

- Training sessions, frequency and types
- Football types
- Types of injuries and question structure
- Head impacts and question content
- Questions on memory/cognitive function and the TYM test

The final questionnaire design was reviewed and trialled by 10 retired players at the PFA and 5 from Notts County Football Club.FC group. The time range for the ex-players to complete the questionnaire was 30-60 min and the feedback received was positive.

### **Outcome measures and statistical analysis**

Continuous data will be presented as mean and standard deviations (SD) and categorical variables as frequencies and percentages. The statistical tests used to determine whether there is a significant difference between responses received from footballers and controls will be: t-test for normal distributions, Mann-Whitney U test for non-normal distributions, and Chi-square test for proportions with exact p values reported. Statistical significance will be set at  $p < 0.05$  with no allowances made for the number of statistical tests undertaken.

The prevalence of foot/ankle OA or neurodegenerative disease (and cognitive impairment) (self-reported or clinically assessed) with 95% confidence interval (CI) will be estimated per population. A Poisson regression model will be used to calculate prevalence risk ratio, adjusted for confounding factors such as age, body mass index (BMI), marital status, education, and social status. Linear (for continuous outcome) and logistic (for dichotomous outcome) regression analyses will be used to determine risk factors related to the outcome of interests within footballers. The results of this study will follow the STROBE guidelines for the reporting of observational studies<sup>50</sup>.

#### *Sample size calculation*

We used a value of 14.3% prevalence for foot/ankle OA in the general population<sup>51</sup> and an odds ratio of 2 (to be clinically meaningful) between retired footballers and general population. The sample size was calculated using the z test and a multiple logistic regression model with a correlation factor  $R^2$  of 0.3 among multiple risk factors/covariates using G\*Power V.3.1.9.2.<sup>52</sup> Assuming footballers would have a greater risk of foot/ankle OA than controls (one tail), with power at 90% and significance at 0.05, 210 participants per group is required for foot/ankle OA outcome. We also calculated the sample size for neurodegenerative disease using the same method. According to 6.4% prevalence for neurodegenerative diseases in the general population<sup>53</sup>, and 3.5 times more risk in the footballers reported recently in the FIELD study<sup>19</sup>, the sample size required is 113 per group for this outcome with power at 90% and significance at 0.05. We will therefore use the larger sample size 210 per group for this study. We will recruit at least 250 retired professional footballers and 250 general population control men with a 16% leeway to account for potential dropouts and attrition.

1 For the postal questionnaire, we will contact all available retired professional footballers (n=900) and an  
2 age-matched sample of general population men (n=1100). Considering a 60% response rate based on  
3 our previous follow-up study<sup>54</sup>, we would expect 540 footballers and 720 control men to respond to the  
4 questionnaire. This will provide sufficient samples from both groups to recruit the sub-sample of at least  
5 250 participants per group required for the clinical assessments to achieve 90% power.  
6  
7  
8  
9

## 11 Discussion

13 To the best of our knowledge, this is the largest comparative study aiming to examine the prevalence  
14 and associated risk factors of the two common conditions, foot/ankle osteoarthritis (OA) and  
15 neurodegenerative disease in retired professional footballers versus age and sex matched general  
16 population controls. The study is expected to confirm the recent findings from the FIELD study  
17 concerning the increased risk of neurodegenerative disease in professional football players, but will also  
18 provide new evidence on whether concussion, head injury, ball type, number of games, training, position  
19 of play, are related to the increased risk of having this condition in later life. Unlike the FIELD study, this  
20 study will recruit the participants who are still alive to measure both severe disease phenotypes such as  
21 physician diagnosed dementia or Parkinson's as well as milder phenotypes such as mild cognitive  
22 impairment. Foot/ankle pain and OA will also be measured and compared between the two populations,  
23 which will further characterise the distribution of osteoarthritis and provide further evidence on the  
24 burden of foot/ankle OA in professional footballers over the general population controls following our  
25 previous study on knee OA<sup>22</sup>. An advantage of this 2 in 1 study is that it may help to mitigate the selection  
26 bias, which often occurs in a single disease study where people with the study condition may be more  
27 likely (or less likely) to participate. Comorbidities/multimorbidity such as cardiovascular diseases,  
28 diabetes, depression, chronic widespread pain, fibromyalgia and quality of life will also be collected to  
29 compare the general health status between footballers and matched controls.  
30  
31  
32  
33  
34  
35  
36  
37  
38  
39  
40  
41

42 However, the study has several limitations. Firstly, it is a cross-sectional study which can only confirm  
43 association but not causality. We have therefore planned to follow up the two cohorts for incidence of  
44 the diseases in the future. This has been considered for knee OA and multimorbidity following our  
45 previous study in knee OA, and we will be able to follow up the incidence of neurodegenerative  
46 disease/cognitive impairment and foot/ankle pain and OA as well in the future. Secondly, the study is  
47 not free from selection bias, e.g., footballers will not be selected randomly from all clubs but from our  
48 previous dataset. The same is true for the control population from the East Midlands because of the  
49 convenience of assessment in our local hospital. In addition, we are unable to randomly select  
50 participants who would like to have radiographs but need to take account of the distance to travel to the  
51 assigned NHS radiography departments. Thirdly, individuals who have developed marked cognitive and  
52 motor impairment may be unable or decline to respond to the questionnaire, leading to selection bias  
53 towards milder conditions. Last but not least, the COVID-19 pandemic has affected the project and  
54 protocols. We were unable to *conduct* face-to-face assessments of cognitive and motor function, or to  
55  
56  
57  
58  
59  
60

1 obtain radiographs (Nottingham, Southampton, Salford, Leeds, and Imperial College London). The  
2 project was temporarily halted following the national lockdown due to the COVID pandemic in March  
3 2020. Following management committee meetings and advice from the University of Nottingham  
4 governance/Research Ethics Committee/Health Research Authority teams, it was decided to amend the  
5 original protocol from in-person assessments to telephone assessments in order to enable the study to  
6 begin. This approach was not possible for some of the neurocognitive assessments, and these were  
7 replaced with the TICS-m.<sup>36 37</sup> The TICS-m uses questions from MOCA and MMSE, with which it is  
8 highly correlated; it is a much shorter assessment and can be administered by telephone so is safer for  
9 all involved during the pandemic and lockdown. The VFT, HVLTL, and IADL<sup>41 43 45 46</sup> were also retained  
10 as they can be administered by telephone, however the planned clinical neurological assessments  
11 (motor function) were removed.

12 Although the gold standard for testing cognitive function, and diagnosis of mild cognitive impairment  
13 (MCI) and dementia is face-to-face assessment using a battery of standardised and validated cognitive  
14 tests,<sup>55</sup> these are not without their drawbacks.<sup>56</sup> TICS-m is the most frequently used telephone-based  
15 cognitive screening test in medium-large studies and epidemiological surveys.<sup>55</sup> Key advantages include  
16 little evidence of ceiling and/or practice effects, and its better acceptance by participants who find the  
17 telephone interview less threatening than a face-to-face battery of cognitive tests in clinic.<sup>36</sup> Although  
18 hearing and communication may pose an issue for some, this can be mitigated by a skilled interviewer.<sup>36</sup>  
19 <sup>57</sup> In contrast, the foot/ankle radiographs require NHS clinical radiology services, these have to be fully  
20 suspended until research activities within Hospital trusts are resumed.

21 In conclusion, we expect that the results of our study will establish prevalence of foot and ankle OA  
22 symptoms; radiographic prevalence of foot and ankle OA; and prevalence of cognitive impairment and  
23 neurodegenerative diseases in ex-professional footballers compared to general population controls.  
24 Thus, providing the much-needed answers following on from recent evidence that professional  
25 footballers had a 3.5 times higher death rate from neurodegenerative diseases compared with  
26 population controls.<sup>19</sup> Given that football is played professionally and recreationally in over 200  
27 countries by more than 250 million people,<sup>58</sup> robust evidence on mental and physical health and well-  
28 being in retired professional footballers is a vital first step in establishing risk profiles, which will assist  
29 in developing effective prevention strategies for mitigating against longer-term health consequences.

## 30 **Ethics and dissemination**

31 All study aspects were approved by the East Midlands-Leicester Central Research Ethics Committee  
32 and HRA (REC ref: 19/EM/0354) on 23 January 2020. Study results will be submitted to the FA, Versus  
33 Arthritis, regulatory authorities, and peer reviewed journals for publication and presented at national and  
34 international conferences. Study participants will be provided with any resulting publications at their  
35 request.

## 36 **Data statement**

1 All data will be collected and stored in accordance with the Data Protection Act, 2018, University of  
2 Nottingham and NHS data handling and maintenance guidelines. The CRF will only collect the minimum  
3 required information for the purposes of the study. The study will be conducted in accordance with the  
4 ethical principles that have their origin in the Declaration of Helsinki, 1996; the principles of Good Clinical  
5 Practice and the UK Department of Health Policy Framework for Health and Social Care, 2017.  
6  
7  
8  
9  
10

### 11 **Authors' contributions**

12 SE drafted, revised, finalised the manuscript, implemented (conducted) the study and NHS Trust  
13 collaborating centres. SE and GSF designed and developed the Footballer Questionnaires. GSF, MD,  
14 WZ conceptualised the study. All authors were involved in the design and development of the study  
15 protocols. SE, AT, EH and WZ collected data. All authors reviewed the draft and approved the final  
16 manuscript. WZ is the guarantor for the project.  
17  
18  
19  
20  
21  
22

### 23 **Acknowledgments**

24 We are grateful to Mr Les Bradd and all other retired professional footballers who gave their time and  
25 expertise to contribute to this study, including those from Notts County Football Club, The PFA,  
26 especially Mr Richard Jobson, and all our PPI group. We also extend our gratitude to Dr Jerry M Brown  
27 for his helpful discussion and invaluable advice on the TYM test, and our collaborators Professors Cathy  
28 Bowen, and Terry O'Neill, and Drs Richard Wakefield, Mo Aslam, and Lucy Gates. We are indebted to  
29 Dr Charlotte Cowie for her guidance and support throughout the past few years. We wish to  
30 acknowledge the FA, the PFA, Versus Arthritis, and the University of Nottingham for supporting this  
31 study, and King Abdulaziz University, Jeddah, Saudi Arabia for sponsoring AT's PhD programme.  
32 Finally, we are thankful to our participants both from the retired professional football players and those  
33 from the general population dwelling adults from the East-Midlands. Without their pertinent and  
34 persistent support over the past years, we would not be able to undertake this study especially during  
35 the COVID-19 pandemic/lockdown.  
36  
37  
38  
39  
40  
41  
42  
43  
44  
45  
46

### 47 **Figure Legend**

48 Figure 1: Flow chart of FOCUS study stages and procedures. \*Minimum sample size according to  
49 sample size calculation.  
50  
51  
52

### 53 **Funding statement**

54 This work is supported by grants from Versus Arthritis, grant number (21595) and The Football  
55 Association (FA), grant number (not applicable).  
56  
57  
58

### 59 **Competing interests.**

60 CF provides consultancy services to the English Premier League.



1 **Patient consent for publication.** Not required

2  
3  
4 **Provenance and peer review.** Not commissioned, externally peer reviewed for ethical and funding  
5 approval prior to submission.  
6  
7  
8  
9

## 10 **References**

- 11 1. Drawer S, Fuller CW. Propensity for osteoarthritis and lower limb joint pain in retired professional  
12 soccer players. *Br J Sports Med* 2001;35(6):402-8. doi: 10.1136/bjism.35.6.402 [published  
13 Online First: 2001/12/01]
- 14 2. Hawkins RD, Fuller CW. A prospective epidemiological study of injuries in four English professional  
15 football clubs. *British journal of sports medicine* 1999;33(3):196-203. doi:  
16 10.1136/bjism.33.3.196
- 17 3. Ekstrand J, Hägglund M, Waldén M. Injury incidence and injury patterns in professional football:  
18 the UEFA injury study. *Br J Sports Med* 2011;45(7):553-8. doi: 10.1136/bjism.2009.060582  
19 [published Online First: 2009/06/26]
- 20 4. López-Valenciano A, Ruiz-Pérez I, Garcia-Gómez A, et al. Epidemiology of injuries in professional  
21 football: a systematic review and meta-analysis. *British journal of sports medicine*  
22 2020;54(12):711. doi: 10.1136/bjsports-2018-099577
- 23 5. Chomiak J, Junge A, Peterson L, et al. Severe injuries in football players. Influencing factors. *The*  
24 *American journal of sports medicine* 2000;28(5 Suppl):S58-68. doi: 10.1177/28.suppl\_5.s-  
25 58 [published Online First: 2000/10/14]
- 26 6. Waldén M, Hägglund M, Ekstrand J. Time-trends and circumstances surrounding ankle injuries in  
27 men's professional football: an 11-year follow-up of the UEFA Champions League injury  
28 study. *Br J Sports Med* 2013;47(12):748-53. doi: 10.1136/bjsports-2013-092223 [published  
29 Online First: 2013/07/03]
- 30 7. Jain N, Murray D, Kemp S, et al. Frequency and trends in foot and ankle injuries within an English  
31 Premier League Football Club using a new impact factor of injury to identify a focus for injury  
32 prevention. *Foot Ankle Surg* 2014;20(4):237-40. doi: 10.1016/j.fas.2014.05.004 [published  
33 Online First: 2014/12/03]
- 34 8. Kuijt MT, Inklaar H, Gouttebauge V, et al. Knee and ankle osteoarthritis in former elite soccer  
35 players: a systematic review of the recent literature. *J Sci Med Sport* 2012;15(6):480-7. doi:  
36 10.1016/j.jsams.2012.02.008 [published Online First: 2012/05/11]
- 37 9. Gouttebauge V, Aoki H, Kerkhoffs G. Lower extremity osteoarthritis is associated with lower  
38 health-related quality of life among retired professional footballers. *Phys Sportsmed*  
39 2018;46(4):471-76. doi: 10.1080/00913847.2018.1451718 [published Online First:  
40 2018/03/13]
- 41 10. Turner A, Barlow J, Ilbery B. Play Hurt, Live Hurt: Living with and Managing Osteoarthritis from  
42 the Perspective of Ex-professional Footballers. *J Health Psychol* 2002;7(3):285-301. doi:  
43 10.1177/1359105302007003222 [published Online First: 2002/05/01]
- 44 11. Turner AP, Barlow JH, Heathcote-Elliott C. Long term health impact of playing professional  
45 football in the United Kingdom. *British journal of sports medicine* 2000;34(5):332-36. doi:  
46 10.1136/bjism.34.5.332
- 47 12. Fernandes GS, Parekh SM, Moses J, et al. Depressive symptoms and the general health of retired  
48 professional footballers compared with the general population in the UK: a case-control  
49 study. *BMJ Open* 2019;9(9):e030056. doi: 10.1136/bmjopen-2019-030056 [published  
50 Online First: 2019/09/11]
- 51 13. Rutherford A, Stewart W, Bruno D. Heading for trouble: is dementia a game changer for football?  
52 *British journal of sports medicine* 2019;53(6):321-22. doi: 10.1136/bjsports-2017-097627
- 53 14. Guskiewicz KM, Marshall SW, Bailes J, et al. Association between recurrent concussion and late-  
54 life cognitive impairment in retired professional football players. *Neurosurgery*  
55 2005;57(4):719-26; discussion 19-26. doi: 10.1093/neurosurgery/57.4.719 [published  
56 Online First: 2005/10/22]
- 57 15. Lee MJ. Increase risk for neurodegenerative diseases in professional athletes. University of  
58 Boston, 2015.
- 59 16. Ling H, Morris HR, Neal JW, et al. Mixed pathologies including chronic traumatic encephalopathy  
60 account for dementia in retired association football (soccer) players. *Acta Neuropathol*

- 2017;133(3):337-52. doi: 10.1007/s00401-017-1680-3 [published Online First: 2017/02/17]
17. Fann JR, Ribe AR, Pedersen HS, et al. Long-term risk of dementia among people with traumatic brain injury in Denmark: a population-based observational cohort study. *Lancet Psychiatry* 2018;5(5):424-31. doi: 10.1016/s2215-0366(18)30065-8 [published Online First: 2018/04/15]
18. Fuller CW, Junge A, Dvorak J. A six year prospective study of the incidence and causes of head and neck injuries in international football. *Br J Sports Med* 2005;39 Suppl 1(Suppl 1):i3-9. doi: 10.1136/bjism.2005.018937 [published Online First: 2005/07/28]
19. Mackay DF, Russell ER, Stewart K, et al. Neurodegenerative Disease Mortality among Former Professional Soccer Players. *New England Journal of Medicine* 2019;381(19):1801-08. doi: 10.1056/NEJMoa1908483
20. Kontos AP, Braithwaite R, Chrisman SPD, et al. Systematic review and meta-analysis of the effects of football heading. *Br J Sports Med* 2017;51(15):1118-24. doi: 10.1136/bjsports-2016-096276 [published Online First: 2016/12/23]
21. Tarnutzer AA, Straumann D, Brugger P, et al. Persistent effects of playing football and associated (subconcussive) head trauma on brain structure and function: a systematic review of the literature. *Br J Sports Med* 2017;51(22):1592-604. doi: 10.1136/bjsports-2016-096593 [published Online First: 2016/11/07]
22. Fernandes GS, Parekh SM, Moses J, et al. Prevalence of knee pain, radiographic osteoarthritis and arthroplasty in retired professional footballers compared with men in the general population: a cross-sectional study. *Br J Sports Med* 2018;52(10):678-83. doi: 10.1136/bjsports-2017-097503 [published Online First: 2017/11/05]
23. Parekh SM, Fernandes GS, Moses JP, et al. Risk Factors for Knee Osteoarthritis in Retired Professional Footballers: A Cross-Sectional Study. *Clinical journal of sport medicine : official journal of the Canadian Academy of Sport Medicine* 2019 doi: 10.1097/JSM.0000000000000742 [published Online First: 2019/06/04]
24. Faul F, Erdfelder E, Lang A-G, et al. G\*Power 3: A flexible statistical power analysis program for the social, behavioral, and biomedical sciences. *Behavior Research Methods* 2007;39(2):175-91. doi: 10.3758/BF03193146
25. Fernandes GS, Sarmanova A, Warner S, et al. Knee pain and related health in the community study (KPIC): a cohort study protocol. *BMC Musculoskelet Disord* 2017;18(1):404. doi: 10.1186/s12891-017-1761-4
26. Wolfe F, Clauw DJ, Fitzcharles MA, et al. Fibromyalgia criteria and severity scales for clinical and epidemiological studies: a modification of the ACR Preliminary Diagnostic Criteria for Fibromyalgia. *J Rheumatol* 2011;38(6):1113-22. doi: 10.3899/jrheum.100594 [published Online First: 2011/02/03]
27. Freynhagen R, Baron R, Gockel U, et al. painDETECT: a new screening questionnaire to identify neuropathic components in patients with back pain. *Curr Med Res Opin* 2006;22(10):1911-20. doi: 10.1185/030079906x132488 [published Online First: 2006/10/07]
28. Sullivan MJL, Bishop SR, Pivik J. The Pain Catastrophizing Scale: Development and validation. *Psychological Assessment* 1995;7(4):524-32. doi: 10.1037/1040-3590.7.4.524
29. Chatterton BD, Muller S, Thomas MJ, et al. Inter and intra-rater repeatability of the scoring of foot pain drawings. *Journal of Foot and Ankle Research* 2013;6(1):44. doi: 10.1186/1757-1146-6-44
30. Spinhoven P, Ormel J, Sloekers PP, et al. A validation study of the Hospital Anxiety and Depression Scale (HADS) in different groups of Dutch subjects. *Psychol Med* 1997;27(2):363-70. doi: 10.1017/s0033291796004382 [published Online First: 1997/03/01]
31. Bjelland I, Dahl AA, Haug TT, et al. The validity of the Hospital Anxiety and Depression Scale. An updated literature review. *J Psychosom Res* 2002;52(2):69-77. doi: 10.1016/s0022-3999(01)00296-3 [published Online First: 2002/02/08]
32. Ware JE, Jr., Sherbourne CD. The MOS 36-item short-form health survey (SF-36). I. Conceptual framework and item selection. *Med Care* 1992;30(6):473-83. [published Online First: 1992/06/11]
33. Medical Outcomes Study: 36-item Short Form Survey [Available from: [https://www.rand.org/health-care/surveys\\_tools/mos/36-item-short-form.html](https://www.rand.org/health-care/surveys_tools/mos/36-item-short-form.html)].
34. McCrory P, Meeuwisse W, Dvorak J, et al. Consensus statement on concussion in sport—the 5<sup>th</sup> international conference on concussion in sport held in Berlin, October 2016. *British journal of sports medicine* 2017;51(11):838-47. doi: 10.1136/bjsports-2017-097699

- 1 35. Brown J, Pengas G, Dawson K, et al. Self administered cognitive screening test (TYM) for  
2 detection of Alzheimer's disease: cross sectional study. *Bmj* 2009;338:b2030. doi:  
3 10.1136/bmj.b2030 [published Online First: 2009/06/11]
- 4 36. Brandt J, Spencer M, Folstein M. The Telephone Interview for Cognitive Status. *Neuropsychiatry,*  
5 *Neuropsychology, & Behavioral Neurology* 1988;1(2):111-17.
- 6 37. de Jager CA, Budge MM, Clarke R. Utility of TICS-M for the assessment of cognitive function in  
7 older adults. *Int J Geriatr Psychiatry* 2003;18(4):318-24. doi: 10.1002/gps.830 [published  
8 Online First: 2003/04/04]
- 9 38. Smith MM, Tremont G, Ott BR. A review of telephone-administered screening tests for dementia  
10 diagnosis. *Am J Alzheimers Dis Other Demen* 2009;24(1):58-69. doi:  
11 10.1177/1533317508327586 [published Online First: 2009/01/01]
- 12 39. Welsh KA, Breitner JC, Magruder-Habib KM. Detection of dementia in the elderly using telephone  
13 screening of cognitive status. *Neuropsychiatry, Neuropsychology, & Behavioral Neurology*  
14 1993;6(2):103-10.
- 15 40. Wolfson C, Kirkland SA, Raina PS, et al. Telephone-administered cognitive tests as tools for the  
16 identification of eligible study participants for population-based research in aging. *Can J*  
17 *Aging* 2009;28(3):251-9. doi: 10.1017/s0714980809990092 [published Online First:  
18 2009/10/29]
- 19 41. Alegret M, Peretó M, Pérez A, et al. The Role of Verb Fluency in the Detection of Early Cognitive  
20 Impairment in Alzheimer's Disease. *J Alzheimers Dis* 2018;62(2):611-19. doi: 10.3233/jad-  
21 170826 [published Online First: 2018/02/27]
- 22 42. Gomez RG, White DA. Using verbal fluency to detect very mild dementia of the Alzheimer type.  
23 *Arch Clin Neuropsychol* 2006;21(8):771-5. doi: 10.1016/j.acn.2006.06.012 [published  
24 Online First: 2006/10/03]
- 25 43. Brandt J. The hopkins verbal learning test: Development of a new memory test with six  
26 equivalent forms. *Clinical Neuropsychologist* 1991;5(2):125-42. doi:  
27 10.1080/13854049108403297
- 28 44. Hogervorst E, Combrinck M, Lapuerta P, et al. The Hopkins Verbal Learning Test and screening  
29 for dementia. *Dement Geriatr Cogn Disord* 2002;13(1):13-20. doi: 10.1159/000048628  
30 [published Online First: 2001/12/04]
- 31 45. Association AP. Diagnostic and Statistical Manual of Mental Disorders. Fifth Edition ed. Arlington  
32 VA: American Psychiatric Publishing 2013.
- 33 46. Lawton MP, Brody EM. Assessment of Older People: Self-Maintaining and Instrumental Activities  
34 of Daily Living1. *The Gerontologist* 1969;9(3\_Part\_1):179-86. doi:  
35 10.1093/geront/9.3\_Part\_1.179
- 36 47. Menz HB, Munteanu SE, Landorf KB, et al. Radiographic classification of osteoarthritis in  
37 commonly affected joints of the foot. *Osteoarthritis Cartilage* 2007;15(11):1333-8. doi:  
38 10.1016/j.joca.2007.05.007 [published Online First: 2007/07/13]
- 39 48. Kraus VB, Kilfoil TM, Hash TW, 2nd, et al. Atlas of radiographic features of osteoarthritis of the  
40 ankle and hindfoot. *Osteoarthritis Cartilage* 2015;23(12):2059-85. doi:  
41 10.1016/j.joca.2015.08.008 [published Online First: 2015/09/01]
- 42 49. Kellgren JH, Lawrence JS. Radiological assessment of osteo-arthrosis. *Ann Rheum Dis*  
43 1957;16(4):494-502. doi: 10.1136/ard.16.4.494 [published Online First: 1957/12/01]
- 44 50. von Elm E, Altman DG, Egger M, et al. The Strengthening the Reporting of Observational Studies  
45 in Epidemiology (STROBE) statement: guidelines for reporting observational studies. *The*  
46 *Lancet* 2007;370(9596):1453-57. doi: 10.1016/S0140-6736(07)61602-X
- 47 51. Roddy E, Thomas MJ, Marshall M, et al. The population prevalence of symptomatic radiographic  
48 foot osteoarthritis in community-dwelling older adults: cross-sectional findings from the  
49 Clinical Assessment Study of the Foot. *Annals of the Rheumatic Diseases* 2015;74(1):156.  
50 doi: 10.1136/annrheumdis-2013-203804
- 51 52. Faul F, Erdfelder E, Buchner A, et al. Statistical power analyses using G\*Power 3.1: Tests for  
52 correlation and regression analyses. *Behavior Research Methods* 2009;41(4):1149-60. doi:  
53 10.3758/BRM.41.4.1149
- 54 53. Lobo A, Launer LJ, Fratiglioni L, et al. Prevalence of dementia and major subtypes in Europe: A  
55 collaborative study of population-based cohorts. Neurologic Diseases in the Elderly Research  
56 Group. *Neurology* 2000;54(11 Suppl 5):S4-9. [published Online First: 2000/06/15]
- 57 54. Ingham SL, Zhang W, Doherty SA, et al. Incident knee pain in the Nottingham community: a  
58 12-year retrospective cohort study. *Osteoarthritis Cartilage* 2011;19(7):847-52. doi:  
59 10.1016/j.joca.2011.03.012
- 60 55. Herr M, Ankri J. A critical review of the use of telephone tests to identify cognitive impairment  
in epidemiology and clinical research. *J Telemed Telecare* 2013;19(1):45-54. doi:  
10.1177/1357633x12474962 [published Online First: 2013/02/08]

- 1 56. Pachana NA, Alpass FM, Blakey JA, et al. A comparison of the MMSE and the TICS-m in hearing-  
2 impaired older adults. *Australasian Journal on Ageing* 2006;25(2):89-93. doi:  
3 <https://doi.org/10.1111/j.1741-6612.2006.00156.x>
- 4 57. Kliegel M, Martin M, Jäger T. Development and validation of the Cognitive Telephone Screening  
5 Instrument (COGTEL) for the assessment of cognitive function across adulthood. *J Psychol*  
6 2007;141(2):147-70. doi: 10.3200/jrlp.141.2.147-172 [published Online First: 2007/05/08]
- 7 58. Kunz M. 265 million playing football. FIFA Magazine. Zurich: FIFA 2007 [Available from:  
8 [https://condorperformance.com/wp-content/uploads/2020/02/emaga\\_9384\\_10704.pdf](https://condorperformance.com/wp-content/uploads/2020/02/emaga_9384_10704.pdf).  
9  
10  
11  
12  
13  
14  
15  
16  
17  
18  
19  
20  
21  
22  
23  
24  
25  
26  
27  
28  
29  
30  
31  
32  
33  
34  
35  
36  
37  
38  
39  
40  
41  
42  
43  
44  
45  
46  
47  
48  
49  
50  
51  
52  
53  
54  
55  
56  
57  
58  
59  
60

**Figure 1** Flow chart of FOCUS study stages and procedures. \* Minimum sample size according to the sample size calculation

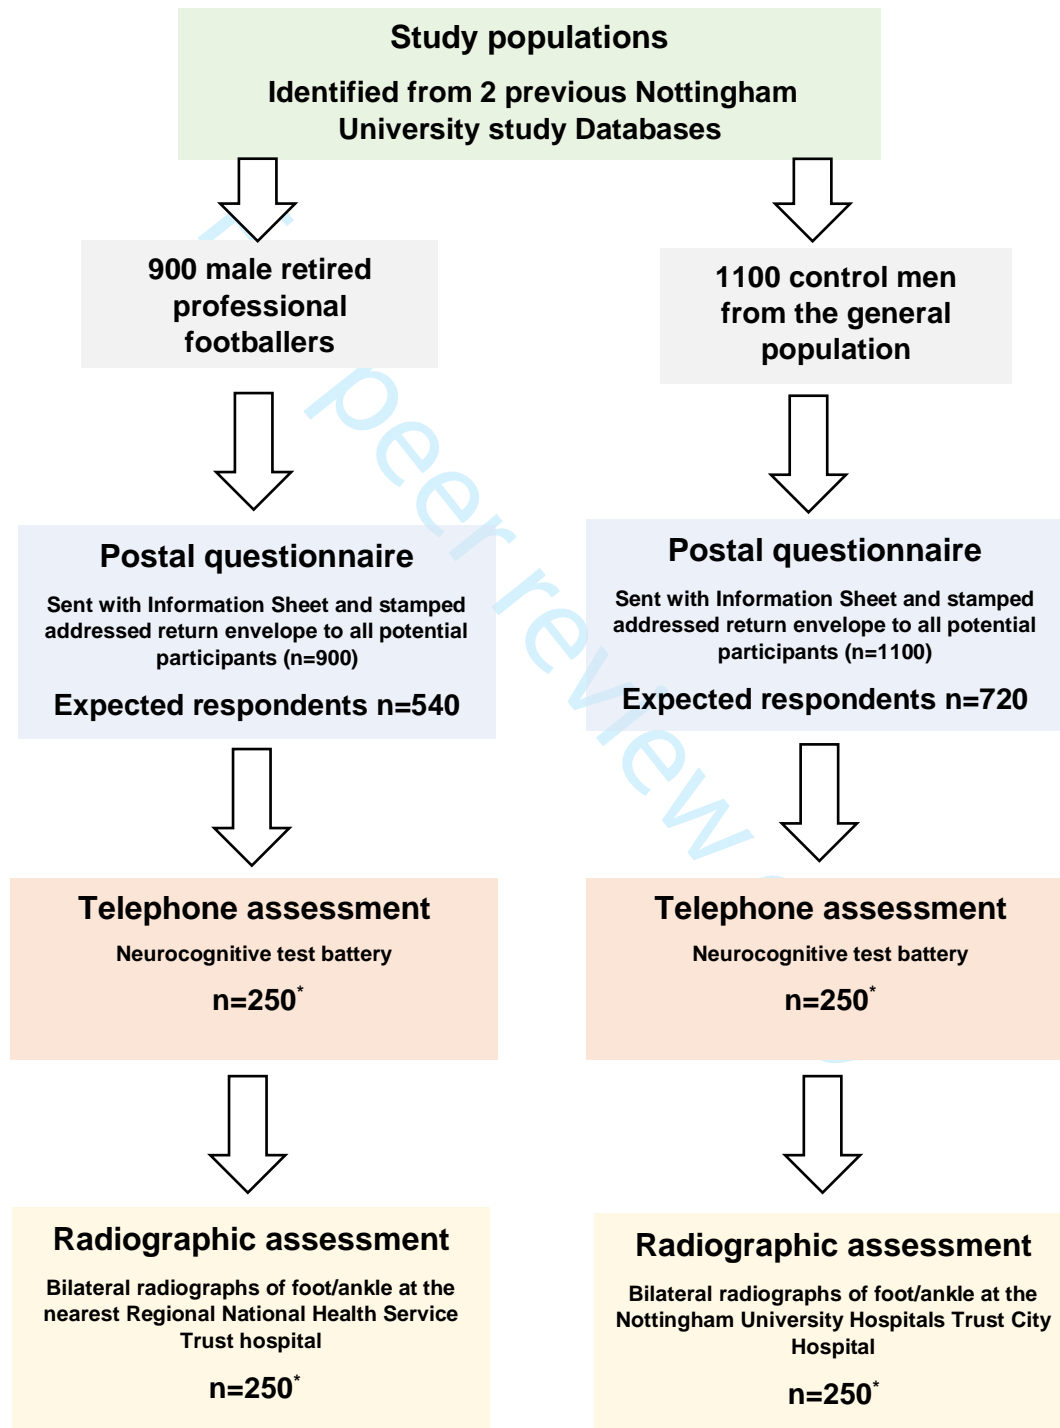

# BMJ Open

## Foot and ankle Osteoarthritis and Cognitive impairment in retired UK Soccer players (FOCUS): protocol for a cross-sectional comparative study with general population controls

|                                 |                                                                                                                                                                                                                                                                                                                                                                                                                                                                                                                                                                                                                                                                                                                                                                                                                                                                                                                                                                                                                                                                                                                                                                                                                                                                                                                                                                                                                                                                                                                  |
|---------------------------------|------------------------------------------------------------------------------------------------------------------------------------------------------------------------------------------------------------------------------------------------------------------------------------------------------------------------------------------------------------------------------------------------------------------------------------------------------------------------------------------------------------------------------------------------------------------------------------------------------------------------------------------------------------------------------------------------------------------------------------------------------------------------------------------------------------------------------------------------------------------------------------------------------------------------------------------------------------------------------------------------------------------------------------------------------------------------------------------------------------------------------------------------------------------------------------------------------------------------------------------------------------------------------------------------------------------------------------------------------------------------------------------------------------------------------------------------------------------------------------------------------------------|
| Journal:                        | <i>BMJ Open</i>                                                                                                                                                                                                                                                                                                                                                                                                                                                                                                                                                                                                                                                                                                                                                                                                                                                                                                                                                                                                                                                                                                                                                                                                                                                                                                                                                                                                                                                                                                  |
| Manuscript ID                   | bmjopen-2021-054371.R1                                                                                                                                                                                                                                                                                                                                                                                                                                                                                                                                                                                                                                                                                                                                                                                                                                                                                                                                                                                                                                                                                                                                                                                                                                                                                                                                                                                                                                                                                           |
| Article Type:                   | Protocol                                                                                                                                                                                                                                                                                                                                                                                                                                                                                                                                                                                                                                                                                                                                                                                                                                                                                                                                                                                                                                                                                                                                                                                                                                                                                                                                                                                                                                                                                                         |
| Date Submitted by the Author:   | 19-Dec-2021                                                                                                                                                                                                                                                                                                                                                                                                                                                                                                                                                                                                                                                                                                                                                                                                                                                                                                                                                                                                                                                                                                                                                                                                                                                                                                                                                                                                                                                                                                      |
| Complete List of Authors:       | <p>Espahbodi, Shima; University of Nottingham, Academic Rheumatology, School of Medicine; Centre for Sport, Exercise and Osteoarthritis Versus Arthritis, University of Nottingham</p> <p>Fernandes, Gwen; University of Nottingham, Academic Rheumatology, School of Medicine; University of Bristol, Population Health Sciences</p> <p>Hogervorst, Eef ; Loughborough University, NCSEM, School of Sport, Exercise and Health Sciences</p> <p>Thanoon, Ahmed; University of Nottingham, Academic Rheumatology, School of Medicine; Centre for Sport, Exercise and Osteoarthritis Versus Arthritis, University of Nottingham</p> <p>Batt, Mark; Centre for Sports, Exercise and Osteoarthritis Versus Arthritis, University of Nottingham; Nottingham University Hospitals NHS Trust, Sports Medicine</p> <p>Fuller, Colin; Colin Fuller Consultancy Ltd</p> <p>Fuller, Gordon; The University of Sheffield, Centre for Urgent and Emergency Research</p> <p>Ferguson, Eamonn; University of Nottingham, Psychology</p> <p>Bast, Tobias; University of Nottingham, Psychology; University of Nottingham, Neuroscience@Nottingham</p> <p>Doherty, Michael ; University of Nottingham, Academic Rheumatology, School of Medicine; Centre for Sport, Exercise and Osteoarthritis Versus Arthritis, University of Nottingham</p> <p>Zhang, Weiya; University of Nottingham, Academic Rheumatology, School of Medicine; Centre for Sport, Exercise and Osteoarthritis Versus Arthritis, University of Nottingham</p> |
| <b>Primary Subject Heading</b>: | Sports and exercise medicine                                                                                                                                                                                                                                                                                                                                                                                                                                                                                                                                                                                                                                                                                                                                                                                                                                                                                                                                                                                                                                                                                                                                                                                                                                                                                                                                                                                                                                                                                     |
| Secondary Subject Heading:      | Epidemiology                                                                                                                                                                                                                                                                                                                                                                                                                                                                                                                                                                                                                                                                                                                                                                                                                                                                                                                                                                                                                                                                                                                                                                                                                                                                                                                                                                                                                                                                                                     |
| Keywords:                       | EPIDEMIOLOGY, Dementia < NEUROLOGY, RHEUMATOLOGY, SPORTS MEDICINE                                                                                                                                                                                                                                                                                                                                                                                                                                                                                                                                                                                                                                                                                                                                                                                                                                                                                                                                                                                                                                                                                                                                                                                                                                                                                                                                                                                                                                                |
|                                 |                                                                                                                                                                                                                                                                                                                                                                                                                                                                                                                                                                                                                                                                                                                                                                                                                                                                                                                                                                                                                                                                                                                                                                                                                                                                                                                                                                                                                                                                                                                  |

1  
2  
3  
4  
5  
6  
7  
8  
9  
10  
11  
12  
13  
14  
15  
16  
17  
18  
19  
20  
21  
22  
23  
24  
25  
26  
27  
28  
29  
30  
31  
32  
33  
34  
35  
36  
37  
38  
39  
40  
41  
42  
43  
44  
45  
46  
47  
48  
49  
50  
51  
52  
53  
54  
55  
56  
57  
58  
59  
60

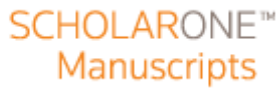

1 **Foot and ankle Osteoarthritis and Cognitive impairment in retired UK Soccer players**  
2 **(FOCUS): protocol for a cross-sectional comparative study with general population**  
3 **controls**  
4  
5  
6

7 Shima Espahbodi,<sup>1,2,3</sup> Gwen S Fernandes,<sup>1,4</sup> Eef Hogervorst,<sup>5</sup> Ahmed Thanoon,<sup>1,2,3</sup> Mark Batt,<sup>2,10</sup> Colin  
8 W Fuller,<sup>6</sup> Gordon Fuller,<sup>7</sup> Eamonn Ferguson,<sup>3,8</sup> Tobias Bast,<sup>3,8,9</sup> Michael Doherty,<sup>1,2,3</sup> Weiya  
9 Zhang<sup>1,2,3,8,11</sup>  
10  
11  
12  
13  
14

15 <sup>1</sup> Academic Rheumatology, School of Medicine, University of Nottingham, UK

16 <sup>2</sup> Centre for Sport, Exercise and Osteoarthritis Research Versus Arthritis, University of Nottingham

17 <sup>3</sup> Pain Centre Versus Arthritis, University of Nottingham

18 <sup>4</sup> Population Health Sciences, Bristol Medical School, University of Bristol, UK

19 <sup>5</sup> NCSEM, School of Sport, Exercise and Health Sciences, Loughborough University

20 <sup>6</sup> Colin Fuller Consultancy Ltd, Sutton Bonington, UK

21 <sup>7</sup> Gordon Fuller, Centre for Urgent and Emergency Research, University of Sheffield

22 <sup>8</sup> School of Psychology, University of Nottingham

23 <sup>9</sup> Neuroscience@Nottingham, University of Nottingham

24 <sup>10</sup> Nottingham University Hospitals NHS Trust

25 <sup>11</sup> National Institution for Health Research (NIHR), Nottingham Biological Research Centre

26  
27  
28  
29  
30  
31  
32  
33  
34  
35  
36  
37  
38  
39  
40  
41  
42 Address for correspondence

43 shima.espahbodi1@nottingham.ac.uk

44  
45  
46 Word count: 4109  
47  
48  
49  
50  
51  
52  
53  
54  
55  
56  
57  
58  
59  
60



## 1 **ABSTRACT**

### 2 **Introduction**

3 Professional footballers commonly experience sports-related injury and repetitive microtrauma to the  
4 foot and ankle, placing them at risk of subsequent chronic pain and osteoarthritis (OA) of the foot and  
5 ankle. Similarly, repeated heading of the ball, head/neck injuries and concussion have been implicated  
6 in later development of neurodegenerative diseases such as dementia. A recent retrospective study  
7 found that death from neurodegenerative diseases was higher amongst former professional soccer  
8 players compared with age matched controls. However, well-designed lifetime studies are still needed  
9 to provide evidence regarding the prevalence of these conditions and their associated risk factors in  
10 retired professional football players compared to the general male population.  
11  
12  
13  
14  
15  
16

### 17 **Objectives**

18 To determine whether former professional male footballers have a higher prevalence than the general  
19 male population of: (1) foot/ankle pain and radiographic OA; and (2) cognitive and motor impairments  
20 associated with dementia and Parkinson's disease. Secondary objectives are to identify specific  
21 football-related risk factors such as head impact/concussion for neurodegenerative conditions and  
22 foot/ankle injuries for chronic foot/ankle pain and OA.  
23  
24  
25  
26  
27  
28

### 29 **Methods and analysis**

30 This is a cross-sectional, comparative study involving a questionnaire survey with sub-samples of  
31 responders being assessed for neurocognitive function by telephone assessment, and foot/ankle OA by  
32 radiographic examination. A sample of 900 adult, male, ex professional footballers will be recruited and  
33 compared with a control group of 1100 age-matched general population men between 40-100 years old.  
34 Prevalence will be estimated per group. Poisson regression will be performed to determine prevalence  
35 ratio between the populations and Logistic regression will be used to examine risk factors associated  
36 with each condition in footballers.  
37  
38  
39  
40  
41  
42  
43

### 44 **Ethics and dissemination**

45 This study was approved by the East Midlands-Leicester Central Research Ethics Committee on 23  
46 January 2020 (REC ref: 19/EM/0354). The study results will be disseminated at national and  
47 international meetings and submitted for peer-review publication.  
48  
49  
50  
51

### 52 **Strengths and limitations of this study**

- 53 • Largest study of head injuries/heading, concussion, ball type, and cognitive impairment in retired  
54 professional footballers versus controls in the UK.
- 55 • Largest study of foot/ankle injuries and OA/pain in retired professional footballers versus controls in  
56 the UK, with standardised foot/ankle radiographs obtained in a sample of each
- 57 • Case-control study design with control men recruited from a community-based population sample  
58 representative of men in the UK general population.  
59  
60

- 1
  - 2
  - 3
  - 4
  - 5
  - 6
  - 7
  - 8
  - 9
  - 10
  - 11
  - 12
  - 13
  - 14
  - 15
  - 16
  - 17
  - 18
  - 19
  - 20
  - 21
  - 22
  - 23
  - 24
  - 25
  - 26
  - 27
  - 28
  - 29
  - 30
  - 31
  - 32
  - 33
  - 34
  - 35
  - 36
  - 37
  - 38
  - 39
  - 40
  - 41
  - 42
  - 43
  - 44
  - 45
  - 46
  - 47
  - 48
  - 49
  - 50
  - 51
  - 52
  - 53
  - 54
  - 55
  - 56
  - 57
  - 58
  - 59
  - 60
- Self-reporting of injuries and concussive symptomatology during careers/lifetime may be subject to recall bias, and non-involvement by individuals with severe cognitive impairment may cause left censorship.

For peer review only

## INTRODUCTION

Professional footballers are at high-risk of sports-related injuries, including those to the head, thigh, knee and foot/ankle.<sup>1</sup> Over the past 25 years, the prevalence of injuries to the thigh (23-26%), foot/ankle (20-23%) and knee (14-18%) have consistently been reported to be the three most common injury sites in professional football.<sup>2-6</sup> A study of one English Premier League club found that over a 4-season period, 20% of all injuries involved the foot/ankle with a mean return to play time of 54 days.<sup>7</sup> Injuries to the ankle lateral ligament complex, particularly the anterior talofibular ligament, were most frequent, accounting for 31% of all foot/ankle injuries. More minor repetitive impact-loading to the ankle/foot may also lead to joint and periarticular injury. However, despite the high incidence of acute injuries there is a paucity of robust evidence regarding subsequent osteoarthritis (OA) development and chronic pain in the foot/ankle joints of professional footballers. Some studies report a prevalence of ankle OA ranging from 12% - 17%.<sup>1 8</sup> However, these studies had small sample sizes without adequate control groups and were based on self-reported diagnosed ankle OA. Importantly, there are no published data on the prevalence of foot pain and foot OA in retired professional footballers. Consequently, foot and ankle OA is not formally recognised as an occupational disease for professional footballers, and there is a lack of evidence regarding the football-related risk factors associated with this condition.

Retired professional footballers with OA have a significantly lower health-related quality of life (QoL) compared to players without OA.<sup>9</sup> Ninety per cent of former professional footballers suffering with OA have moderate to severe joint pain, and 37% of these retired players reported moderate to severe depression and anxiety due to their medical condition.<sup>1 10</sup> In ex- UK footballers with OA, a higher frequency of disability and work-related disability has been reported compared to those without OA.<sup>11</sup> More recently we reported that depressive and anxiety symptoms in ex-footballers are comparable to that in the general population. However, ex-footballers reported significantly more sleep problems, negative mood profiles, more widespread bodily pain, and higher analgesic usage compared to controls.<sup>12</sup> Whilst OA might not be a life-threatening disease, its long-term effects on both the physical and mental health of a retired footballing population need further attention.

Professional footballers may also be at increased risk of developing neurodegenerative diseases such as dementias and Parkinson's disease, potentially arising from major neck/head injury, overt mild traumatic brain injury (mTBI) causing concussion, or repetitive microtrauma from heading the ball.<sup>13-16</sup> TBI has been identified as a risk factor for the development of dementia in the general population, specifically Alzheimer's, in a longitudinal cohort study (n=2.8 million) spanning 36 years.<sup>17</sup> In that study, moderate to severe TBI increased dementia risk across all ages, whereas mTBI (concussion) increased risk in those aged over 65 years.<sup>17</sup> Repetitive heading of the ball during matches and training sessions, head-to-head or head to elbow/knee/foot collisions between players, or accidental heading might additionally result in concussion, neuropsychiatric and cognitive deficits.<sup>18</sup> The recent FIELD study retrospectively compared mortality from neurodegenerative disease in 7676 former professional soccer

1 players with that amongst 23000 matched general population controls in Scotland. Former footballers  
2 had a 3.5 times higher death rate from neurodegenerative diseases compared to matched controls.  
3 Risk of death varied according to disease subtype and was 5 times higher in those with Alzheimer's and  
4 2 times higher in those with Parkinson's respectively.<sup>19</sup> Whilst of considerable importance, these  
5 findings need to be confirmed in the life-time of professional footballers and matched controls. Still, little  
6 is known about the increased prevalence of neurodegenerative diseases and related risk factors among  
7 retired professional players. Recent literature continues to be conflicting and no study has provided  
8 conclusive evidence for the relationship between heading/head impacts and neurodegenerative  
9 diseases. Two recent systematic reviews support these conclusions and emphasise the need for high  
10 quality, large-scale prospective studies.<sup>20 21</sup>

11  
12  
13  
14  
15  
16  
17  
18  
19 Previously, we demonstrated a 2-3 times higher prevalence of knee OA in 1207 male ex-footballers  
20 compared to 4085 men in the general population<sup>22</sup> and identified knee injury and training load as the  
21 main football-specific factors for this.<sup>23</sup> We will use the same population samples for the Foot/ankle  
22 Osteoarthritis and Cognitive impairment in UK Soccer players (FOCUS) study. The primary  
23 objectives of this study are to determine whether, compared to age-matched men in the general  
24 population, ex-professional UK footballers have a higher prevalence of:  
25  
26  
27  
28

- 29 (1) foot/ankle pain and radiographic OA; and  
30  
31 (2) cognitive impairment, and neurodegenerative diseases particularly dementia and Parkinson's  
32 disease.  
33

34  
35 Secondary objectives are to identify factors associated with the risks of these conditions in footballers.  
36  
37  
38

39 We have intentionally included investigations into foot/ankle OA together with neurodegenerative  
40 disease in this single cross-sectional study as it will allow both important research questions to be  
41 addressed concurrently. Furthermore, we anticipate that embedding questions and assessments on  
42 mental/cognitive function into a general health survey may increase the response rate and minimise  
43 the selection bias compared to asking questions in a survey focused solely on a single disease.  
44  
45  
46  
47  
48

## 49 **METHODS AND ANALYSIS**

### 50 **Study design**

51  
52 This will be a cross-sectional study comparing UK male ex-professional footballers and age-matched  
53 men in the general population. It will involve three discrete stages: (1) a postal questionnaire survey to  
54 all study participants; (2) a telephone assessment of cognitive function in a sub-sample of each group;  
55 and (3) a radiographic assessment of both feet and ankles in a sub-sample of each group. The planned  
56 start and end dates for the study are August 2020-December 2022. Figure 1 shows the study stages  
57 and procedures.  
58  
59  
60

## Participants and recruitment

The FOCUS footballer questionnaire, together with a Participant Information Sheet, Consent Form, stamped return envelope, and letter of endorsement from the Professional Footballers' Association (PFA) and Football Association (FA), will be posted across the UK to 900 ex-professional male footballers who previously participated in the Nottingham knee OA footballer study<sup>22 24</sup> and who indicated willingness to be contacted again for future studies. All are retired male footballers aged 40-100 years old, registered with the PFA or club player Association (League Club level). A slightly adapted questionnaire (e.g., no questions are included related to professional football), Participant Information Sheet, Consent Form, and stamped return envelope will be sent to 1100 age-matched men aged 40-100 in the East Midlands general population, who are on the Knee Pain in the Community (KPIC) database<sup>25</sup> and have indicated willingness to be contacted about new studies. This is the same source for general population controls as in our previous study on knee OA in footballers.<sup>22</sup> The Participant Information sheets state the entirely voluntary nature of the study with no inducements for participation. After four weeks a Reminder letter with questionnaire pack will be posted to those participants from whom there has been no response to the initial questionnaire pack.

Questionnaire responders who indicate willingness to be contacted further for telephone assessment and/or radiographs will be selected for stages 2 and 3, respectively. At least two hundred and fifty telephone assessments will be conducted first, and the radiographs will be obtained later when COVID-19 restrictions permit us to utilize NHS Trust Radiology facilities. Exclusion criteria for the assessments include an inability to provide written informed consent (both assessments) and severe injury, amputation or neuropathic (Charcot) arthropathy of both feet (radiographic assessment only), and at the participant's request.

At least two hundred and fifty footballers will be invited to attend the radiology department of their nearest NHS collaborating hospital where foot/ankle radiographs will be undertaken. The selection will be based on first come first served, as well as the convenience to travel to the nearest hospitals. Currently we have five collaborating NHS hospitals including Nottingham, Salford, Leeds, Southampton, and Imperial College London. Similarly, at least 250 control men from a community-based population sample located within Nottingham and adjacent areas (Derbyshire, Lincolnshire, Leicestershire) representative of men in the general UK population, will have radiographs at Nottingham City Hospital campus. Return of completed questionnaires will be taken as consent to the questionnaire survey. For those participants agreeing to a telephone assessment consent will be taken verbally over the phone, after the participants have read and agreed to the consent form and patient information sheet posted to them. All participants attending for radiographs will be met by our research team who will obtain written informed consent prior to the taking of radiographs.

## Questionnaire

Our FOCUS footballer questionnaire was designed to capture detailed information about foot/ankle pain, GP-diagnosed OA, significant injuries, surgery, and injections to the feet/ankles. Latter sections of the questionnaire capture detailed information about GP-diagnosed dementia, Alzheimer's and Parkinson's disease, the frequency of heading the ball during professional play, the type of ball, concussion history/symptoms, head injuries, and memory/cognition problems. For the general population male controls, the questionnaire includes all the same questions except for the absence of specific football-related questions. The layout/format of the questionnaire is consistent between footballers and control men.<sup>25</sup> Table 1 summarises the FOCUS questionnaire domains.

**Table 1** FOCUS Questionnaire domains and measurements

| Section Domains                           | Questions and Instruments                                                                                                                                                                                                                                                                                                                                                                                                                                                                                                                                                                                                                                                                      |
|-------------------------------------------|------------------------------------------------------------------------------------------------------------------------------------------------------------------------------------------------------------------------------------------------------------------------------------------------------------------------------------------------------------------------------------------------------------------------------------------------------------------------------------------------------------------------------------------------------------------------------------------------------------------------------------------------------------------------------------------------|
| 1. Demographic and current health         | Date of birth, height, weight, list of comorbidities including diabetes, stroke, dementia, Alzheimer's, Parkinson's, depression, anxiety, HBP. Smoking and alcohol consumption. All current medication both prescribed and alternative/over the counter.                                                                                                                                                                                                                                                                                                                                                                                                                                       |
| 2. Bodily pain                            | Body pain mannequin for previous month's pain (current). fibromyalgia mannequin (WPI) and SSSs past week's pain.                                                                                                                                                                                                                                                                                                                                                                                                                                                                                                                                                                               |
| 3. Foot and ankle pain                    | Pain present in the feet and/or ankles in the past month (current) and/or past 3 months (chronic), age at pain onset, diagnosis of foot OA, region specific <i>significant</i> foot pain (ankle, mid-foot, big toe, other toes) and age range at onset of pain. Pain Detect Questionnaire and Pain Catastrophizing Scale.                                                                                                                                                                                                                                                                                                                                                                      |
| 4. Injuries and operations to feet/ankles | Significant football-related injury to ankles/feet/toes. Region specific (ankle, mid-foot, big toe, other toes) total number of significant football injuries throughout career, Type of Injury (e.g. ligament rupture) and age. Significant NON-football related injury ever (same questions as above).<br><br>Injections into ankles, type of injection (cortisone, anaesthetic, don't know, or other), greatest number of injections into each ankle in a season, and throughout career. Injections elsewhere in foot, where and how many. Surgical interventions to ankle or toes, type of procedure (e.g. fracture fixation), and age. If flat-footed as informed by health professional. |
| 5. Hallux valgus                          | Current and constitutional toe alignment using line drawings (straight or bunion/degree of angulation).                                                                                                                                                                                                                                                                                                                                                                                                                                                                                                                                                                                        |
| 6. How you feel                           | Hospital Anxiety and Depression Scale (HADS).                                                                                                                                                                                                                                                                                                                                                                                                                                                                                                                                                                                                                                                  |
| 7. Quality of life                        | Short Form-36 (SF-36) Health Survey.                                                                                                                                                                                                                                                                                                                                                                                                                                                                                                                                                                                                                                                           |
| 8. Heading during professional football   | Heading frequency during a professional match and training session. General <i>heading play</i> (minor, moderate, major) during a match. Specific 'Only Heading' training sessions                                                                                                                                                                                                                                                                                                                                                                                                                                                                                                             |

ever, frequency pre-season and during season. Type of football played with during career.

## 9. Concussion and head injuries

Concussion Definition. Concussion diagnosis from professional football play, number of episodes, symptoms. Concussion diagnosis from other/accident/fall, number, symptoms. Serious head injury, number, diagnosis. Frequency of Head impact NOT from heading not concussive. Concussion symptoms ever from professional play (unreported), frequency, symptoms. Concussion symptoms ever (unreported) outside of professional football e.g., fall, accident, number, symptoms.

## 10. Memory and thinking

Current Memory problems, worsening, causing difficulty with daily function, work or socially. The Test Your memory (TYM) Questionnaire.

HBP - High Blood Pressure; WPI - Widespread Pain Index; SSS - Symptom Severity Scale; OA - osteoarthritis Pain Detect Questionnaire, Pain Catastrophizing Scale, Hospital Anxiety and Depression Scale, SF-36 Health Survey and Test Your Memory Questionnaire are referenced in the main text.

The questionnaire requests information about the individual, their medical history, smoking and alcohol usage, and all current medications whether prescribed or over the counter. A body pain mannequin is used to record pain experienced for most days of the past month anywhere in the body, and the widespread pain index (WPI) and system severity scale (SSS)<sup>26</sup> are included to identify symptoms and likely diagnosis of fibromyalgia. Line drawings illustrating different regions of the foot (i.e. toes, mid-foot, and heel) allow participants to specify the site of any significant pain for most days in the past month and/or over a three month period. The Pain Detect Questionnaire (PDQ), modified to focus on ankle/foot pain only, will be used to screen for neuropathic type pain,<sup>27</sup> and the participants' thoughts and feelings during their foot pain experience will be measured with the Pain Catastrophizing Scale.<sup>28</sup>

The footballers are asked to report any football-related significant injury ever sustained to their feet, ankles, or toes as one which *caused pain for most days for at least a 3-month period* and the type of injury. A similar free text and tick-box table is included which asks for any significant non-football related injuries to the feet/ankles/toes. Information regarding injections into the ankles over the course of the players career are requested via a tick box table (type of injectable, location, side) and total number ever received in any season. A similar table with a free text and tick-box asks the footballers to report any surgery to their ankle and/or toes. Control participants are asked the same set of questions about significant injury, injections, and surgery to the ankles and/or toes but without mention of football. Current toe alignment and constitutional toe alignment (in their 20's) will be assessed in all participants using validated line drawings.<sup>29</sup>

Anxiety and depression symptoms will be assessed using the well validated Hospital and Anxiety Depression Scale (HADS).<sup>30 31</sup> Quality of Life (QoL) will be measured with the well-validated RAND 36-item Health Survey 1.0 (SF-36) adapted for the physical and mental health components respectively.<sup>32</sup>

1 Information related to heading the ball during footballers' professional careers will be captured with  
2 detailed questions developed with our retired footballer group (see Patient and Public Involvement).  
3 This will be followed with questions related to concussion diagnoses, symptomatology, and head  
4 injuries/impacts both during professional play and outside of professional football.<sup>34</sup> Control participants  
5 will be asked the same questions relating to head injury and concussions but without mention of football.  
6  
7  
8  
9

10  
11 Final sections will capture information on memory/cognition and include the Test Your Memory (TYM)  
12 assessment,<sup>35</sup> which can be self-administered for use in postal surveys (personal communication JM  
13 Brown 2019). TYM is a short cognitive test for detecting Alzheimer's disease (AD) and other cognitive  
14 problems and is reported to be more sensitive for detecting mild AD than the Mini Mental State  
15 Examination (MMSE).<sup>35</sup>  
16  
17  
18  
19

### 20 21 22 **Telephone cognitive assessments**

23 Telephone assessments will follow a standardised script starting with the researchers introducing  
24 themselves and the study, checking that the participant is in a room without distractions, whether they  
25 use a hearing aid, confirming consent, their name and date of birth. An initial call will be made to book  
26 in the telephone assessment at a time convenient to each participant. The validated tools described  
27 below will be administered as per published procedures.  
28  
29  
30

31  
32 Originally developed as a dementia screen, the Telephone Interview for Cognitive Status-modified  
33 (TICS-m) is a test for cognitive function which can be administered over the telephone.<sup>36 37</sup> It includes  
34 four domains on (1) orientation; (2) registration (free recall), recent memory and delayed recall  
35 (memory); (3) attention/calculation; (4) comprehension, semantic memory and repetition (language).  
36 The 13-items (maximum score 39) include: (1) day, date, season, age, telephone number; (2) a 10-word  
37 list learning exercise then free recall of that word list; (3) subtractions and counting backwards; (4)  
38 responsive naming, current reigning monarch and prime minister; (5) word opposites; (6) repetition; and  
39 (7) delayed recall of 10-word list. TICS-m is well validated for detecting a range of mild to moderate  
40 cognitive disorders with comparable sensitivity and specificity as a screening tool for dementia and  
41 Alzheimer's.<sup>38-40</sup>  
42  
43  
44  
45  
46  
47

48 The Verbal Fluency Test (VFT) is a short task of verbal functioning and typically consists of a task called  
49 category (or semantic) fluency where participants are given one minute to name as many unique words  
50 as possible within a semantic category (animals in this study). The category 'animals' is often used,  
51 however alternatives are 'fruits and vegetables', 'cities and towns' and 'items of clothing'. The  
52 participant's score is the number of unique correct words produced in 60 seconds.<sup>41</sup> Word generation  
53 deficits in those with dementia, including Alzheimer's, have been well documented.<sup>42</sup>  
54  
55  
56  
57  
58

59 The Hopkins Verbal Learning Test (HVLT)<sup>43</sup> is a quick and easy to administer tool which will be used to  
60 screen for dementia. It is a word-learning test measuring episodic verbal memory, consists of three  
trials of free-recall of a 12-item (word) list followed by yes/no recognition from the participant. After the



1 third learning trial, the participant is read 24 words and asked to say “yes” for each word that appeared  
2 on the recall list (12 targets) and “no” for each word that did not (12 distractors). The total immediate  
3 recall (reflecting learning ability, is obtained by repeating the same word list 3 times and adding up all  
4 correctly recalled words over the 3 trials) is calculated. Good validity and reliability have been  
5 demonstrated for the HVLIT, and it is cross culturally applicable and well tolerated by elderly people.<sup>44</sup>  
6  
7

8  
9 Along with cognitive measures, we have included the assessment of functional activities as impairment  
10 in these is a critical feature in the diagnosis of dementia.<sup>45</sup> Lawton’s Instrumental Activities Daily Living  
11 (IADL) scale is one of the most commonly used tools consisting of 8 items including 2 community items  
12 (mode of transport and shopping), 3 personal management (ability to use the telephone, handle money  
13 matters, and prepare one’s own medication) and 3 household items (doing housekeeping, laundry, and  
14 preparing food). Responses to each of the eight items in the scale are coded as 0 (unable), 1 (partially  
15 able), or 2 (able) and are the responses summed. Summary scores range from 0 (low function,  
16 dependent) to 8 (high function, independent).<sup>46</sup>  
17  
18  
19  
20  
21  
22  
23

## 24 **Radiographic assessment**

25  
26 Informed written consent will be obtained prior to radiographs which will be performed by each  
27 respective NHS Trust’s radiology staff. Radiographs will be taken bilaterally and weight-bearing for the  
28 foot and ankle separately. Foot dorsoplantar, medial oblique, and lateral views, and ankle  
29 anteroposterior views will be taken, as detailed in the Standard Operating Procedure (SOP).  
30 Examination and scoring of region-specific OA will be done of the hindfoot (ankle, subtalar), midfoot,  
31 and 1<sup>st</sup> metatarsophalangeal joint (MTPJ) using the La Trobe Foot Atlas and scorings.<sup>47, 48</sup> Those with  
32 a Kellgren and Lawrence score of less than 2 for any foot/ankle compartment and equivalent categories  
33 (i.e., completely normal, possible osteophyte or doubtful narrowing) will be defined as non-OA. Those  
34 who satisfy the definition of a KL score of greater than 2 ( $\geq 2$ ) or equivalent for any compartment of either  
35 foot or ankle will be defined as OA.<sup>49</sup> Also, those with foot/ankle OA and concurrent foot/ankle pain will  
36 be defined as symptomatic foot/ankle OA.  
37  
38  
39  
40  
41  
42  
43  
44  
45  
46

## 47 **Patient and public involvement**

48 Questionnaire sections specific to professional football play were developed in partnership with ex-  
49 professional footballer groups, whilst those specific to sports-related concussion and  
50 memory/neurocognitive decline were developed in collaboration with concussion and dementia experts,  
51 (JM Brown).  
52  
53

54  
55 Our retired player group contributed to the content, design and layout of the FOCUS Questionnaire.  
56 Through in-person meetings (SE), two retired professional players from Notts County Football Club  
57 directly advised (having had feedback from other retired players) specifically on the questions pertaining  
58 to:  
59  
60

- Heading frequency and bandings

- Training sessions, frequency and types
- Football types
- Types of injuries and question structure
- Head impacts and question content
- Questions on memory/cognitive function and the TYM test

The final questionnaire design was reviewed and trialled by 10 retired players at the PFA and 5 from Notts County Football Club.FC group. The time range for the ex-players to complete the questionnaire was 30-60 min and the feedback received was positive.

### **Outcome measures and statistical analysis**

Continuous data will be presented as mean and standard deviations (SD) and categorical variables as frequencies and percentages. The statistical tests used to determine whether there is a significant difference between responses received from footballers and controls will be: t-test for normal distributions, Mann-Whitney U test for non-normal distributions, and Chi-square test for proportions with exact p values reported. Statistical significance will be set at  $p < 0.05$  with no allowances made for the number of statistical tests undertaken.

The prevalence of foot/ankle OA or neurodegenerative disease (and cognitive impairment) (self-reported or clinically assessed) with 95% confidence interval (CI) will be estimated per population. A Poisson regression model will be used to calculate prevalence risk ratio, adjusted for confounding factors such as age, body mass index (BMI), education, and socioeconomic status (using postcode as a proxy measure to determine the Index of Multiple Deprivation). Linear (for continuous outcome) and logistic (for dichotomous outcome) regression analyses will be used to determine risk factors related to the outcome of interests within footballers. The results of this study will follow the STROBE guidelines for the reporting of observational studies<sup>50</sup>.

#### *Sample size calculation*

We used a value of 14.3% prevalence for foot/ankle OA in the general population<sup>51</sup> and an odds ratio of 2 (to be clinically meaningful) between retired footballers and general population. The sample size was calculated using the z test and a multiple logistic regression model with a correlation factor  $R^2$  of 0.3 among multiple risk factors/covariates using G\*Power V.3.1.9.2.<sup>52</sup> Assuming footballers would have a greater risk of foot/ankle OA than controls (one tail), with power at 90% and significance at 0.05, 210 participants per group is required for foot/ankle OA outcome. We also calculated the sample size for neurodegenerative disease using the same method. According to 6.4% prevalence for neurodegenerative diseases in the general population<sup>53</sup>, and 3.5 times more risk in the footballers reported recently in the FIELD study<sup>19</sup>, the sample size required is 113 per group for this outcome with power at 90% and significance at 0.05. We will therefore use the larger sample size 210 per group for

1 this study. We will recruit at least 250 retired professional footballers and 250 general population control  
2 men with a 16% leeway to account for potential dropouts and attrition.  
3

4 For the postal questionnaire, we will contact all available retired professional footballers (n=900) and an  
5 age-matched sample of general population men (n=1100). Considering a 60% response rate based on  
6 our previous follow-up study<sup>54</sup>, we would expect 540 footballers and 720 control men to respond to the  
7 questionnaire. This will provide sufficient samples from both groups to recruit the sub-sample of at least  
8 250 participants per group required for the clinical assessments to achieve 90% power.  
9  
10  
11  
12  
13  
14

## 15 Discussion

16 To the best of our knowledge, this is the largest comparative study aiming to examine the prevalence  
17 and associated risk factors of the two common conditions, foot/ankle osteoarthritis (OA) and  
18 neurodegenerative disease in retired professional footballers versus age and sex matched general  
19 population controls. The study is expected to confirm the recent findings from the FIELD study  
20 concerning the increased risk of neurodegenerative disease in professional football players, but will also  
21 provide new evidence on whether concussion, head injury, ball type, number of games, training, position  
22 of play, are related to the increased risk of having this condition in later life. Unlike the FIELD study, this  
23 study will recruit the participants who are still alive to measure both severe disease phenotypes such as  
24 physician diagnosed dementia or Parkinson's as well as milder phenotypes such as mild cognitive  
25 impairment. Foot/ankle pain and OA will also be measured and compared between the two populations,  
26 which will further characterise the distribution of osteoarthritis and provide further evidence on the  
27 burden of foot/ankle OA in professional footballers over the general population controls following our  
28 previous study on knee OA<sup>22</sup>. An advantage of this 2 in 1 study is that it may help to mitigate the selection  
29 bias, which often occurs in a single disease study where people with the study condition may be more  
30 likely (or less likely) to participate. Comorbidities/multimorbidity such as cardiovascular diseases,  
31 diabetes, depression, chronic widespread pain, fibromyalgia and quality of life will also be collected to  
32 compare the general health status between footballers and matched controls.  
33  
34  
35  
36  
37  
38  
39  
40  
41  
42  
43  
44  
45

46 However, the study has several limitations. Firstly, it is a cross-sectional study which can only confirm  
47 association but not causality. We have therefore planned to follow up the two cohorts for incidence of  
48 the diseases in the future. This has been considered for knee OA and multimorbidity following our  
49 previous study in knee OA, and we will be able to follow up the incidence of neurodegenerative  
50 disease/cognitive impairment and foot/ankle pain and OA as well in the future. Secondly, the study is  
51 not free from selection bias, e.g., footballers will not be selected randomly from all clubs but from our  
52 previous dataset. The same is true for the control population from the East Midlands because of the  
53 convenience of assessment in our local hospital. In addition, we are unable to randomly select  
54 participants who would like to have radiographs but need to take account of the distance to travel to the  
55 assigned NHS radiography departments. Thirdly, individuals who have developed marked cognitive and  
56 motor impairment may be unable or decline to respond to the questionnaire, leading to selection bias  
57  
58  
59  
60

1 towards milder conditions. Last but not least, the COVID-19 pandemic has affected the project and  
2 protocols. We were unable to *conduct* face-to-face assessments of cognitive and motor function, or to  
3 obtain radiographs (Nottingham, Southampton, Salford, Leeds, and Imperial College London). The  
4 project was temporarily halted following the national lockdown due to the COVID pandemic in March  
5 2020. Following management committee meetings and advice from the University of Nottingham  
6 governance/Research Ethics Committee/Health Research Authority teams, it was decided to amend the  
7 original protocol from in-person assessments to telephone assessments in order to enable the study to  
8 begin. This approach was not possible for some of the neurocognitive assessments, and these were  
9 replaced with the TICS-m.<sup>36 37</sup> The TICS-m uses questions from MOCA and MMSE, with which it is  
10 highly correlated; it is a much shorter assessment and can be administered by telephone so is safer for  
11 all involved during the pandemic and lockdown. The VFT, HVLTL, and IADL<sup>41 43 45 46</sup> were also retained  
12 as they can be administered by telephone, however the planned clinical neurological assessments  
13 (motor function) were removed.

14 Although the gold standard for testing cognitive function, and diagnosis of mild cognitive impairment  
15 (MCI) and dementia is face-to-face assessment using a battery of standardised and validated cognitive  
16 tests,<sup>55</sup> these are not without their drawbacks.<sup>56</sup> TICS-m is the most frequently used telephone-based  
17 cognitive screening test in medium-large studies and epidemiological surveys.<sup>55</sup> Key advantages include  
18 little evidence of ceiling and/or practice effects, and its better acceptance by participants who find the  
19 telephone interview less threatening than a face-to-face battery of cognitive tests in clinic.<sup>36</sup> Although  
20 hearing and communication may pose an issue for some, this can be mitigated by a skilled interviewer.<sup>36</sup>  
21 <sup>57</sup> In contrast, the foot/ankle radiographs require NHS clinical radiology services, these have to be fully  
22 suspended until research activities within Hospital trusts are resumed.

23 In conclusion, we expect that the results of our study will establish prevalence of foot and ankle OA  
24 symptoms; radiographic prevalence of foot and ankle OA; and prevalence of cognitive impairment and  
25 neurodegenerative diseases in ex-professional footballers compared to general population controls.  
26 Thus, providing the much-needed answers following on from recent evidence that professional  
27 footballers had a 3.5 times higher death rate from neurodegenerative diseases compared with  
28 population controls.<sup>19</sup> Given that football is played professionally and recreationally in over 200  
29 countries by more than 250 million people,<sup>58</sup> robust evidence on mental and physical health and well-  
30 being in retired professional footballers is a vital first step in establishing risk profiles, which will assist  
31 in developing effective prevention strategies for mitigating against longer-term health consequences.

### 52 **Ethics and dissemination**

53 All study aspects were approved by the East Midlands-Leicester Central Research Ethics Committee  
54 and HRA (REC ref: 19/EM/0354) on 23 January 2020. Study results will be submitted to the FA, Versus  
55 Arthritis, regulatory authorities, and peer reviewed journals for publication and presented at national and  
56 international conferences. Study participants will be provided with any resulting publications at their  
57 request.

## Data statement

All data will be collected and stored in accordance with the Data Protection Act, 2018, University of Nottingham and NHS data handling and maintenance guidelines. The CRF will only collect the minimum required information for the purposes of the study. The study will be conducted in accordance with the ethical principles that have their origin in the Declaration of Helsinki, 1996; the principles of Good Clinical Practice and the UK Department of Health Policy Framework for Health and Social Care, 2017.

## Authors' contributions

SE drafted, revised, finalised the manuscript, implemented (conducted) the study and NHS Trust collaborating centres. SE and GSF designed and developed the Footballer Questionnaires. GSF, MD, WZ conceptualised the study. All authors (SE, GSF, EH, AT, MB, CWF, GF, EF, TB, MD, WZ) were involved in the design and development of the study protocols. SE, AT, EH and WZ collected data. All authors reviewed the draft and approved the final manuscript. WZ is the guarantor for the project.

## Acknowledgments

We are grateful to Mr Les Bradd and all other retired professional footballers who gave their time and expertise to contribute to this study, including those from Notts County Football Club, The PFA, especially Mr Richard Jobson, and all our PPI group. We also extend our gratitude to Dr Jerry M Brown for his helpful discussion and invaluable advice on the TYM test, and our collaborators Professors Cathy Bowen, and Terry O'Neill, and Drs Richard Wakefield, Mo Aslam, and Lucy Gates. We are indebted to Dr Charlotte Cowie for her guidance and support throughout the past few years. We wish to acknowledge the FA, the PFA, Versus Arthritis, and the University of Nottingham for supporting this study, and King Abdulaziz University, Jeddah, Saudi Arabia for sponsoring AT's PhD programme. Finally, we are thankful to our participants both from the retired professional football players and those from the general population dwelling adults from the East-Midlands. Without their pertinent and persistent support over the past years, we would not be able to undertake this study especially during the COVID-19 pandemic/lockdown.

## Figure Legend

Figure 1: Flow chart of FOCUS study stages and procedures. \*Minimum sample size according to sample size calculation.

## Funding statement

This work is supported by grants from Versus Arthritis, grant number (21595) and The Football Association (FA), grant number (not applicable).

## Competing interests.

CF provides consultancy services to the English Premier League.

**Patient consent for publication.** Not required

**Provenance and peer review.** Not commissioned, externally peer reviewed for ethical and funding approval prior to submission.

## References

1. Drawer S, Fuller CW. Propensity for osteoarthritis and lower limb joint pain in retired professional soccer players. *Br J Sports Med* 2001;35(6):402-8. doi: 10.1136/bjism.35.6.402 [published Online First: 2001/12/01]
2. Hawkins RD, Fuller CW. A prospective epidemiological study of injuries in four English professional football clubs. *British journal of sports medicine* 1999;33(3):196-203. doi: 10.1136/bjism.33.3.196
3. Ekstrand J, Hägglund M, Waldén M. Injury incidence and injury patterns in professional football: the UEFA injury study. *Br J Sports Med* 2011;45(7):553-8. doi: 10.1136/bjism.2009.060582 [published Online First: 2009/06/26]
4. López-Valenciano A, Ruiz-Pérez I, Garcia-Gómez A, et al. Epidemiology of injuries in professional football: a systematic review and meta-analysis. *British journal of sports medicine* 2020;54(12):711. doi: 10.1136/bjsports-2018-099577
5. Chomiak J, Junge A, Peterson L, et al. Severe injuries in football players. Influencing factors. *The American journal of sports medicine* 2000;28(5 Suppl):S58-68. doi: 10.1177/28.suppl\_5.s-58 [published Online First: 2000/10/14]
6. Waldén M, Hägglund M, Ekstrand J. Time-trends and circumstances surrounding ankle injuries in men's professional football: an 11-year follow-up of the UEFA Champions League injury study. *Br J Sports Med* 2013;47(12):748-53. doi: 10.1136/bjsports-2013-092223 [published Online First: 2013/07/03]
7. Jain N, Murray D, Kemp S, et al. Frequency and trends in foot and ankle injuries within an English Premier League Football Club using a new impact factor of injury to identify a focus for injury prevention. *Foot Ankle Surg* 2014;20(4):237-40. doi: 10.1016/j.fas.2014.05.004 [published Online First: 2014/12/03]
8. Kuijt MT, Inklaar H, Goutteborge V, et al. Knee and ankle osteoarthritis in former elite soccer players: a systematic review of the recent literature. *J Sci Med Sport* 2012;15(6):480-7. doi: 10.1016/j.jsams.2012.02.008 [published Online First: 2012/05/11]
9. Goutteborge V, Aoki H, Kerkhoffs G. Lower extremity osteoarthritis is associated with lower health-related quality of life among retired professional footballers. *Phys Sportsmed* 2018;46(4):471-76. doi: 10.1080/00913847.2018.1451718 [published Online First: 2018/03/13]
10. Turner A, Barlow J, Ilbery B. Play Hurt, Live Hurt: Living with and Managing Osteoarthritis from the Perspective of Ex-professional Footballers. *J Health Psychol* 2002;7(3):285-301. doi: 10.1177/1359105302007003222 [published Online First: 2002/05/01]
11. Turner AP, Barlow JH, Heathcote-Elliott C. Long term health impact of playing professional football in the United Kingdom. *British journal of sports medicine* 2000;34(5):332-36. doi: 10.1136/bjism.34.5.332
12. Fernandes GS, Parekh SM, Moses J, et al. Depressive symptoms and the general health of retired professional footballers compared with the general population in the UK: a case-control study. *BMJ Open* 2019;9(9):e030056. doi: 10.1136/bmjopen-2019-030056 [published Online First: 2019/09/11]
13. Rutherford A, Stewart W, Bruno D. Heading for trouble: is dementia a game changer for football? *British journal of sports medicine* 2019;53(6):321-22. doi: 10.1136/bjsports-2017-097627
14. Guskiewicz KM, Marshall SW, Bailes J, et al. Association between recurrent concussion and late-life cognitive impairment in retired professional football players. *Neurosurgery*

- 2005;57(4):719-26; discussion 19-26. doi: 10.1093/neurosurgery/57.4.719 [published Online First: 2005/10/22]
15. Lee MJ. Increase risk for neurodegenerative diseases in professional athletes. University of Boston, 2015.
  16. Ling H, Morris HR, Neal JW, et al. Mixed pathologies including chronic traumatic encephalopathy account for dementia in retired association football (soccer) players. *Acta Neuropathol* 2017;133(3):337-52. doi: 10.1007/s00401-017-1680-3 [published Online First: 2017/02/17]
  17. Fann JR, Ribe AR, Pedersen HS, et al. Long-term risk of dementia among people with traumatic brain injury in Denmark: a population-based observational cohort study. *Lancet Psychiatry* 2018;5(5):424-31. doi: 10.1016/s2215-0366(18)30065-8 [published Online First: 2018/04/15]
  18. Fuller CW, Junge A, Dvorak J. A six year prospective study of the incidence and causes of head and neck injuries in international football. *Br J Sports Med* 2005;39 Suppl 1(Suppl 1):i3-9. doi: 10.1136/bjism.2005.018937 [published Online First: 2005/07/28]
  19. Mackay DF, Russell ER, Stewart K, et al. Neurodegenerative Disease Mortality among Former Professional Soccer Players. *New England Journal of Medicine* 2019;381(19):1801-08. doi: 10.1056/NEJMoa1908483
  20. Kontos AP, Braithwaite R, Chrisman SPD, et al. Systematic review and meta-analysis of the effects of football heading. *Br J Sports Med* 2017;51(15):1118-24. doi: 10.1136/bjsports-2016-096276 [published Online First: 2016/12/23]
  21. Tarnutzer AA, Straumann D, Brugger P, et al. Persistent effects of playing football and associated (subconcussive) head trauma on brain structure and function: a systematic review of the literature. *Br J Sports Med* 2017;51(22):1592-604. doi: 10.1136/bjsports-2016-096593 [published Online First: 2016/11/07]
  22. Fernandes GS, Parekh SM, Moses J, et al. Prevalence of knee pain, radiographic osteoarthritis and arthroplasty in retired professional footballers compared with men in the general population: a cross-sectional study. *Br J Sports Med* 2018;52(10):678-83. doi: 10.1136/bjsports-2017-097503 [published Online First: 2017/11/05]
  23. Parekh SM, Fernandes GS, Moses JP, et al. Risk Factors for Knee Osteoarthritis in Retired Professional Footballers: A Cross-Sectional Study. *Clinical journal of sport medicine : official journal of the Canadian Academy of Sport Medicine* 2019 doi: 10.1097/JSM.0000000000000742 [published Online First: 2019/06/04]
  24. Faul F, Erdfelder E, Lang A-G, et al. G\*Power 3: A flexible statistical power analysis program for the social, behavioral, and biomedical sciences. *Behavior Research Methods* 2007;39(2):175-91. doi: 10.3758/BF03193146
  25. Fernandes GS, Sarmanova A, Warner S, et al. Knee pain and related health in the community study (KPIC): a cohort study protocol. *BMC Musculoskelet Disord* 2017;18(1):404. doi: 10.1186/s12891-017-1761-4
  26. Wolfe F, Clauw DJ, Fitzcharles MA, et al. Fibromyalgia criteria and severity scales for clinical and epidemiological studies: a modification of the ACR Preliminary Diagnostic Criteria for Fibromyalgia. *J Rheumatol* 2011;38(6):1113-22. doi: 10.3899/jrheum.100594 [published Online First: 2011/02/03]
  27. Freynhagen R, Baron R, Gockel U, et al. painDETECT: a new screening questionnaire to identify neuropathic components in patients with back pain. *Curr Med Res Opin* 2006;22(10):1911-20. doi: 10.1185/030079906x132488 [published Online First: 2006/10/07]
  28. Sullivan MJL, Bishop SR, Pivik J. The Pain Catastrophizing Scale: Development and validation. *Psychological Assessment* 1995;7(4):524-32. doi: 10.1037/1040-3590.7.4.524
  29. Chatterton BD, Muller S, Thomas MJ, et al. Inter and intra-rater repeatability of the scoring of foot pain drawings. *Journal of Foot and Ankle Research* 2013;6(1):44. doi: 10.1186/1757-1146-6-44
  30. Spinhoven P, Ormel J, Sloekers PP, et al. A validation study of the Hospital Anxiety and Depression Scale (HADS) in different groups of Dutch subjects. *Psychol Med* 1997;27(2):363-70. doi: 10.1017/s0033291796004382 [published Online First: 1997/03/01]
  31. Bjelland I, Dahl AA, Haug TT, et al. The validity of the Hospital Anxiety and Depression Scale. An updated literature review. *J Psychosom Res* 2002;52(2):69-77. doi: 10.1016/s0022-3999(01)00296-3 [published Online First: 2002/02/08]
  32. Ware JE, Jr., Sherbourne CD. The MOS 36-item short-form health survey (SF-36). I. Conceptual framework and item selection. *Med Care* 1992;30(6):473-83. [published Online First: 1992/06/11]

- 1 33. Medical Outcomes Study: 36-item Short Form Survey [Available from:  
2 [https://www.rand.org/health-care/surveys\\_tools/mos/36-item-short-form.html](https://www.rand.org/health-care/surveys_tools/mos/36-item-short-form.html).
- 3 34. McCrory P, Meeuwisse W, Dvorak J, et al. Consensus statement on concussion in sport—the  
4 5<sup>th</sup> international conference on concussion in sport held in Berlin, October  
5 2016. *British journal of sports medicine* 2017;51(11):838-47. doi: 10.1136/bjsports-2017-  
6 097699
- 7 35. Brown J, Pengas G, Dawson K, et al. Self administered cognitive screening test (TYM) for  
8 detection of Alzheimer's disease: cross sectional study. *Bmj* 2009;338:b2030. doi:  
9 10.1136/bmj.b2030 [published Online First: 2009/06/11]
- 10 36. Brandt J, Spencer M, Folstein M. The Telephone Interview for Cognitive Status. *Neuropsychiatry,*  
11 *Neuropsychology, & Behavioral Neurology* 1988;1(2):111-17.
- 12 37. de Jager CA, Budge MM, Clarke R. Utility of TICS-M for the assessment of cognitive function in  
13 older adults. *Int J Geriatr Psychiatry* 2003;18(4):318-24. doi: 10.1002/gps.830 [published  
14 Online First: 2003/04/04]
- 15 38. Smith MM, Tremont G, Ott BR. A review of telephone-administered screening tests for dementia  
16 diagnosis. *Am J Alzheimers Dis Other Demen* 2009;24(1):58-69. doi:  
17 10.1177/1533317508327586 [published Online First: 2009/01/01]
- 18 39. Welsh KA, Breitner JC, Magruder-Habib KM. Detection of dementia in the elderly using telephone  
19 screening of cognitive status. *Neuropsychiatry, Neuropsychology, & Behavioral Neurology*  
20 1993;6(2):103-10.
- 21 40. Wolfson C, Kirkland SA, Raina PS, et al. Telephone-administered cognitive tests as tools for the  
22 identification of eligible study participants for population-based research in aging. *Can J*  
23 *Aging* 2009;28(3):251-9. doi: 10.1017/s0714980809990092 [published Online First:  
24 2009/10/29]
- 25 41. Alegret M, Peretó M, Pérez A, et al. The Role of Verb Fluency in the Detection of Early Cognitive  
26 Impairment in Alzheimer's Disease. *J Alzheimers Dis* 2018;62(2):611-19. doi: 10.3233/jad-  
27 170826 [published Online First: 2018/02/27]
- 28 42. Gomez RG, White DA. Using verbal fluency to detect very mild dementia of the Alzheimer type.  
29 *Arch Clin Neuropsychol* 2006;21(8):771-5. doi: 10.1016/j.acn.2006.06.012 [published  
30 Online First: 2006/10/03]
- 31 43. Brandt J. The hopkins verbal learning test: Development of a new memory test with six  
32 equivalent forms. *Clinical Neuropsychologist* 1991;5(2):125-42. doi:  
33 10.1080/13854049108403297
- 34 44. Hogervorst E, Combrinck M, Lapuerta P, et al. The Hopkins Verbal Learning Test and screening  
35 for dementia. *Dement Geriatr Cogn Disord* 2002;13(1):13-20. doi: 10.1159/000048628  
36 [published Online First: 2001/12/04]
- 37 45. Association AP. Diagnostic and Statistical Manual of Mental Disorders. Fifth Edition ed. Arlington  
38 VA: American Psychiatric Publishing 2013.
- 39 46. Lawton MP, Brody EM. Assessment of Older People: Self-Maintaining and Instrumental Activities  
40 of Daily Living1. *The Gerontologist* 1969;9(3\_Part\_1):179-86. doi:  
41 10.1093/geront/9.3\_Part\_1.179
- 42 47. Menz HB, Munteanu SE, Landorf KB, et al. Radiographic classification of osteoarthritis in  
43 commonly affected joints of the foot. *Osteoarthritis Cartilage* 2007;15(11):1333-8. doi:  
44 10.1016/j.joca.2007.05.007 [published Online First: 2007/07/13]
- 45 48. Kraus VB, Kilfoil TM, Hash TW, 2nd, et al. Atlas of radiographic features of osteoarthritis of the  
46 ankle and hindfoot. *Osteoarthritis Cartilage* 2015;23(12):2059-85. doi:  
47 10.1016/j.joca.2015.08.008 [published Online First: 2015/09/01]
- 48 49. Kellgren JH, Lawrence JS. Radiological assessment of osteo-arthrosis. *Ann Rheum Dis*  
49 1957;16(4):494-502. doi: 10.1136/ard.16.4.494 [published Online First: 1957/12/01]
- 50 50. von Elm E, Altman DG, Egger M, et al. The Strengthening the Reporting of Observational Studies  
51 in Epidemiology (STROBE) statement: guidelines for reporting observational studies. *The*  
52 *Lancet* 2007;370(9596):1453-57. doi: 10.1016/S0140-6736(07)61602-X
- 53 51. Roddy E, Thomas MJ, Marshall M, et al. The population prevalence of symptomatic radiographic  
54 foot osteoarthritis in community-dwelling older adults: cross-sectional findings from the  
55 Clinical Assessment Study of the Foot. *Annals of the Rheumatic Diseases* 2015;74(1):156.  
56 doi: 10.1136/annrheumdis-2013-203804
- 57 52. Faul F, Erdfelder E, Buchner A, et al. Statistical power analyses using G\*Power 3.1: Tests for  
58 correlation and regression analyses. *Behavior Research Methods* 2009;41(4):1149-60. doi:  
59 10.3758/BRM.41.4.1149
- 60 53. Lobo A, Launer LJ, Fratiglioni L, et al. Prevalence of dementia and major subtypes in Europe: A  
collaborative study of population-based cohorts. Neurologic Diseases in the Elderly Research  
Group. *Neurology* 2000;54(11 Suppl 5):S4-9. [published Online First: 2000/06/15]



- 1 54. Ingham SL, Zhang W, Doherty SA, et al. Incident knee pain in the Nottingham community: a  
2 12-year retrospective cohort study. *Osteoarthritis Cartilage* 2011;19(7):847-52. doi:  
3 10.1016/j.joca.2011.03.012
- 4 55. Herr M, Ankri J. A critical review of the use of telephone tests to identify cognitive impairment  
5 in epidemiology and clinical research. *J Telemed Telecare* 2013;19(1):45-54. doi:  
6 10.1177/1357633x12474962 [published Online First: 2013/02/08]
- 7 56. Pachana NA, Alpass FM, Blakey JA, et al. A comparison of the MMSE and the TICS-m in hearing-  
8 impaired older adults. *Australasian Journal on Ageing* 2006;25(2):89-93. doi:  
9 <https://doi.org/10.1111/j.1741-6612.2006.00156.x>
- 10 57. Kliegel M, Martin M, Jäger T. Development and validation of the Cognitive Telephone Screening  
11 Instrument (COGTEL) for the assessment of cognitive function across adulthood. *J Psychol*  
12 2007;141(2):147-70. doi: 10.3200/jrlp.141.2.147-172 [published Online First: 2007/05/08]
- 13 58. Kunz M. 265 million playing football. FIFA Magazine. Zurich: FIFA 2007 [Available from:  
14 [https://condorperformance.com/wp-content/uploads/2020/02/emaga\\_9384\\_10704.pdf](https://condorperformance.com/wp-content/uploads/2020/02/emaga_9384_10704.pdf).  
15  
16  
17  
18  
19  
20  
21  
22  
23  
24  
25  
26  
27  
28  
29  
30  
31  
32  
33  
34  
35  
36  
37  
38  
39  
40  
41  
42  
43  
44  
45  
46  
47  
48  
49  
50  
51  
52  
53  
54  
55  
56  
57  
58  
59  
60

**Figure 1** Flow chart of FOCUS study stages and procedures. \* Minimum sample size according to the sample size calculation

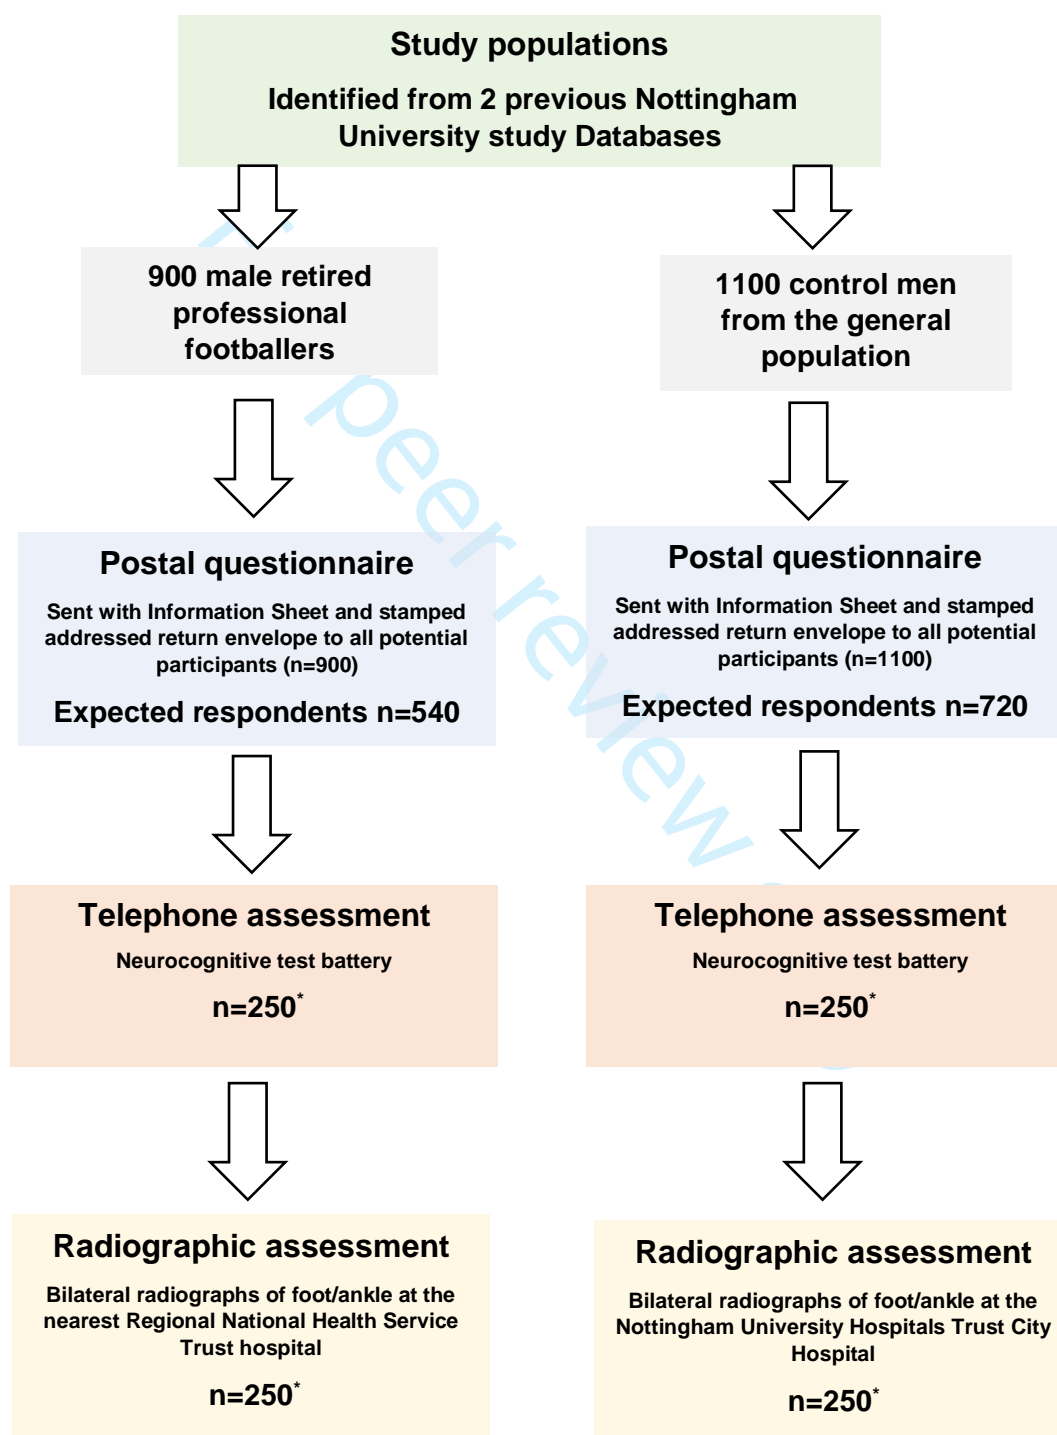

Supplement: bmjopen-2021-054371.draft_revisions.pdf [file bmjopen-2021-054371.draft_revisions.pdf]
